# Supplementary material for: A case study of Pd⋯Pd intramolecular interaction in a benzothiazole based palladacycle; catalytic activity toward amide synthesisviaan isocyanide insertion pathway
Source: Royal Society of Chemistry journal article supplement (doi:10.1039/d0nj06301k), 2021-01-01

## Supporting Information

### *A case study of Pd...Pd intramolecular interaction in benzothiazole based Palladacycle; Catalytic activity toward amides synthesis via isocyanide insertion pathway*

Masood Loni, Yaser Balmohammadi, Reza Dadgar Yeganeh, Kaveh Imani, Behrouz Notash, Ayoob Bazgir

*Department of Chemistry, Shahid Beheshti University G.C., Tehran 1983963113, Iran*

*a\_bazgir@sbu.ac.ir*

## Table of Contents

|                                                          |       |
|----------------------------------------------------------|-------|
| Crystal data and structure refinement for BTP.....       | 2     |
| Computational studies of Pd...Pd interaction in BTP..... | 2-6   |
| EDX .....                                                | 6     |
| P-XRD.....                                               | 6     |
| FT-IR.....                                               | 7     |
| TGA.....                                                 | 8     |
| BET Curve.....                                           | 8     |
| BET results.....                                         | 9     |
| SEM.....                                                 | 9     |
| TEM.....                                                 | 9     |
| Proposed mechanism of MIIr catalyzed by BTP@SBA.....     | 11-17 |
| References.....                                          | 17    |
| Copy of NMR of amides 6.....                             | 18-31 |

## Crystal data and structure refinement for BTP

|                                   |                                                                                                                |
|-----------------------------------|----------------------------------------------------------------------------------------------------------------|
| Identification code               | khc1445b                                                                                                       |
| Empirical formula                 | C <sub>31</sub> H <sub>26</sub> N <sub>2</sub> O <sub>7</sub> Pd <sub>2</sub> S <sub>2</sub>                   |
| Formula weight                    | 815.46                                                                                                         |
| Temperature                       | 298(2) K                                                                                                       |
| Wavelength                        | 0.71073 Å                                                                                                      |
| Crystal system, space group       | Orthorhombic, P 2 <sub>1</sub> 2 <sub>1</sub> 2 <sub>1</sub>                                                   |
| Unit cell dimensions              | a = 7.9107(16) Å    alpha = 90 deg.<br>b = 12.229(2) Å    beta = 90 deg.<br>c = 30.953(6) Å    gamma = 90 deg. |
| Volume                            | 2994.4(10) Å <sup>3</sup>                                                                                      |
| Z, Calculated density             | 4, 1.809 Mg/m <sup>3</sup>                                                                                     |
| Absorption coefficient            | 1.392 mm <sup>-1</sup>                                                                                         |
| F(000)                            | 1624                                                                                                           |
| Crystal size                      | 0.20 x 0.15 x 0.15 mm                                                                                          |
| Theta range for data collection   | 2.58 to 24.99 deg.                                                                                             |
| Limiting indices                  | -8<= <i>h</i> <=9, -12<= <i>k</i> <=14, -32<= <i>l</i> <=36                                                    |
| Reflections collected / unique    | 9420 / 5207 [R(int) = 0.0967]                                                                                  |
| Completeness to theta = 24.99     | 99.9 %                                                                                                         |
| Absorption correction             | Numerical                                                                                                      |
| Max. and min. transmission        | 0.8183 and 0.7681                                                                                              |
| Refinement method                 | Full-matrix least-squares on F <sup>2</sup>                                                                    |
| Data / restraints / parameters    | 5207 / 0 / 403                                                                                                 |
| Goodness-of-fit on F <sup>2</sup> | 0.960                                                                                                          |
| Final R indices [I>2 sigma(I)]    | R1 = 0.0595, wR2 = 0.1257                                                                                      |
| R indices (all data)              | R1 = 0.0897, wR2 = 0.1473                                                                                      |
| Absolute structure parameter      | 0.05(7)                                                                                                        |
| Largest diff. peak and hole       | 0.915 and -0.576 e.Å <sup>-3</sup>                                                                             |

## Computational studies of Pd...Pd interaction in BTP

### Computational details

DFT calculation for constructing theoretical wave function and NBO analysis have been carried out using the Gaussian 09 suite of programs<sup>1</sup>. The selected fragment involved with Pd...Pd interaction was cut out directly from the CIF file and after that it is optimized using B3LYP<sup>2</sup> functional and LANL2DZ<sup>3</sup> basis set. The QTAIM analysis of theoretical charge density is performed using the AIMALL program<sup>4</sup>. The NCI-RDG analysis is performed using Multiwfn program<sup>5</sup>. The gradient isosurface of NCI-RDG is visualized by using the VMD 1.9.2 software<sup>6</sup>. HOMO and LUMO molecular orbitals are depicted using GaussView 5.0 software<sup>1</sup>.

### Comparison of selected geometric parameters of experimental structure with optimized one

| Geometric Parameter | Experimental structure | Optimized Structure |
|---------------------|------------------------|---------------------|
| <b>Distances(Å)</b> |                        |                     |
| Pd1-Pd2             | 2.862                  | 3.195               |
| Pd2-C30             | 1.936                  | 1.996               |
| Pd2-O2              | 2.033                  | 2.077               |
| Pd2-O4              | 2.130                  | 2.172               |
| Pd2-N2              | 2.048                  | 2.079               |
| Pd1-O1              | 2.171                  | 2.173               |
| Pd1-O3              | 2.053                  | 2.076               |
| Pd1-C9              | 1.950                  | 1.996               |
| Pd1-N1              | 2.037                  | 2.079               |
| <b>Angles(°)</b>    |                        |                     |
| N2-Pd2-C30          | 81.95                  | 81.06               |
| N2-Pd2-O4           | 97.60                  | 98.06               |
| C30-Pd2-O2          | 91.82                  | 92.60               |
| O2-Pd2-O4           | 88.67                  | 88.23               |
| O1-Pd1-O3           | 86.02                  | 88.23               |
| O1-Pd1-N1           | 98.94                  | 98.09               |
| C9-Pd1-O3           | 92.31                  | 92.62               |
| N1-Pd1-C9           | 82.70                  | 81.08               |

### Topological and energetic properties at the Bond Critical Points between Palladium atoms involved in Pd...Pd interaction

| Basis set | FUNCTIONAL | $\rho_{\text{BCP}}$ | $\nabla^2\rho_{\text{BCP}}$ | G(BCP) | V(BCP)  | H(BCP) | V(BCP) /G(BCP) |
|-----------|------------|---------------------|-----------------------------|--------|---------|--------|----------------|
| LANL2DZ   | B3LYP      | 0.0171              | 0.0477                      | 0.0115 | -0.0111 | 0.0004 | 0.965          |

### Hirshfield analysis of Pd1...Pd2 axis

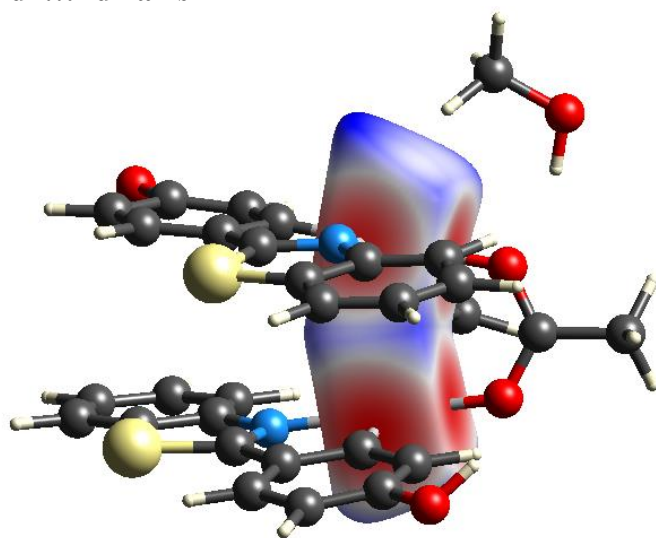

Figure 1. Electrostatic potential of Pd1...Pd2 axis analyze by Hirshfield diagram. The High electron density depicted as Red and low electron density as Blue

### Contour map of Pd...Pd interaction

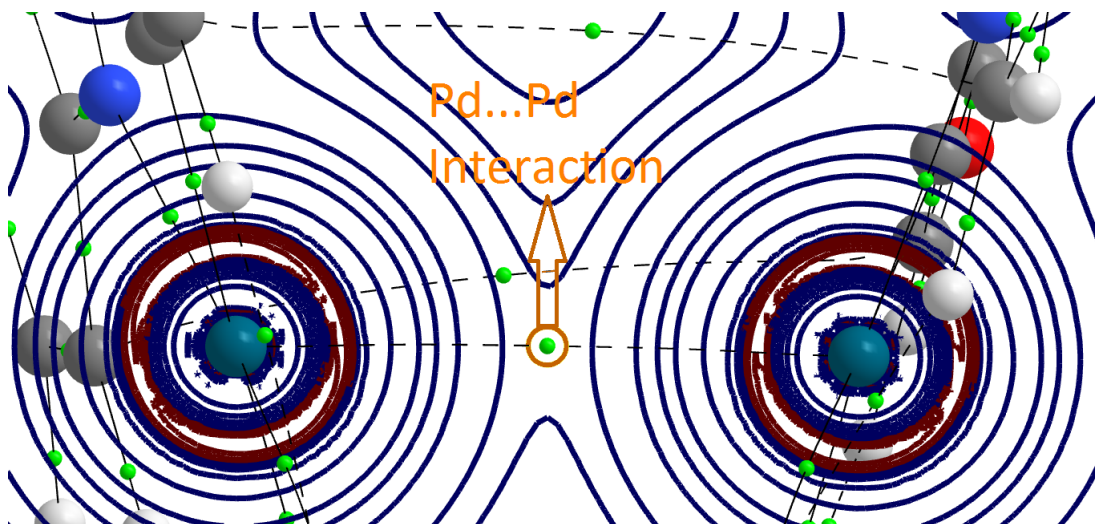

Figure 2. Scheme of contour map of Laplacian of electron density in B3LYP/LANL2DZ computational level. The BCP and positive value of Laplacian for Pd...Pd interaction are represented.

## HOMO and LUMO Molecular orbitals

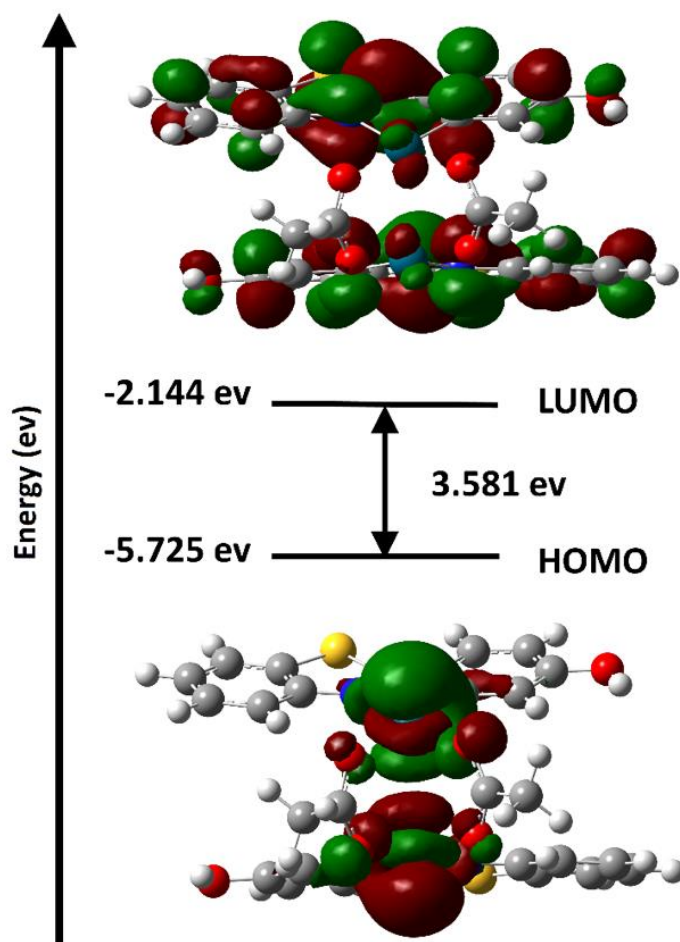

Figure 3. The HOMO and LUMO orbitals of the system and the energy gap between them

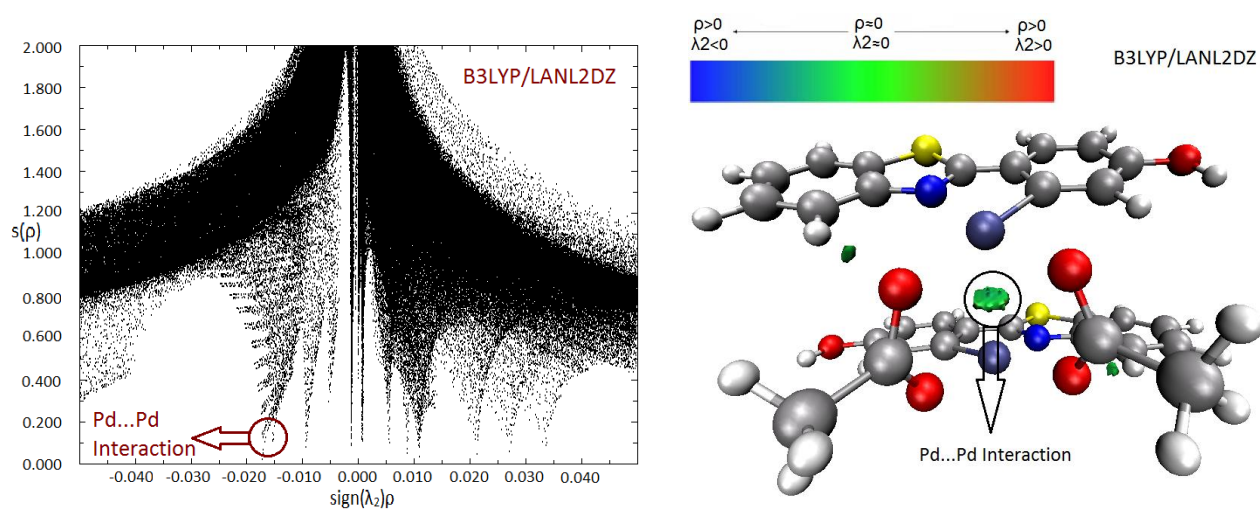

Figure 4. The plots of RDG,  $s(\rho)$ , versus  $\text{sign}(\lambda_2)\rho$  (Left) and colored  $s(\rho)$ -isosurface in B3LYP/LANL2DZ computational method (Right).

## Bond Order By NBO analysis

The bond order of the Pd...Pd interaction was calculated by two NBO criteria; Wiberg bond indices and NAO (natural atomic orbital) bond order. The positive value of the bond order determined by NAO indicates the existence of a net bonding interaction between Pd...Pd.

*Calculated Bond Orders of Pd...Pd Interaction*

| NBO criteria        | Bond Order of Pd...Pd interaction |
|---------------------|-----------------------------------|
| Wiberg bond indices | 0.0912                            |
| NAO bond order      | 0.1814                            |

## EDX

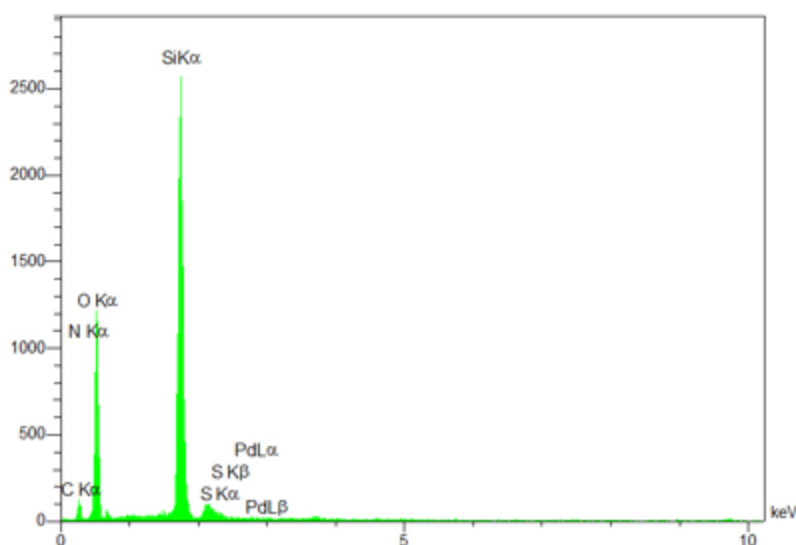

Figure 5. The EDX elemental analysis of BTP@SBA

## P-XRD

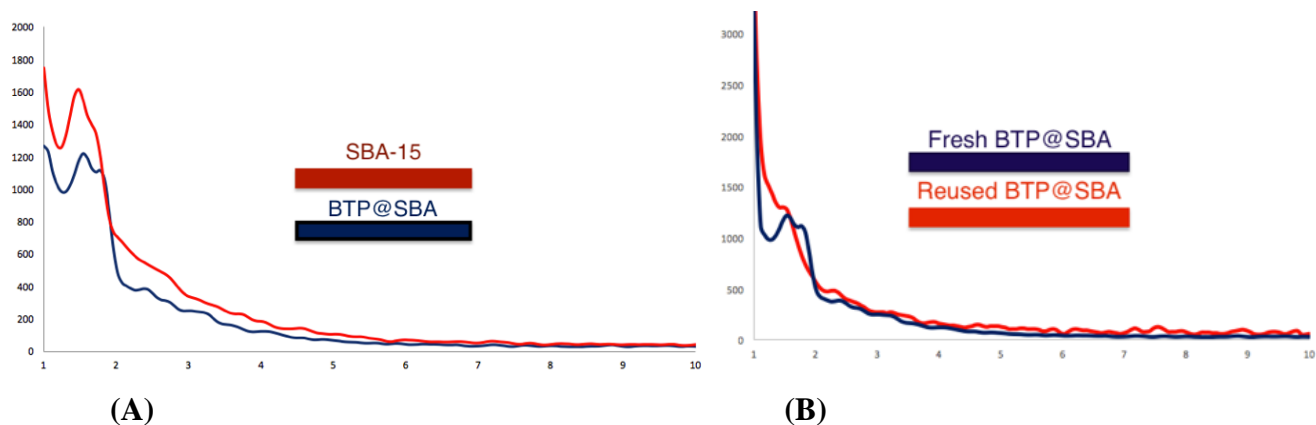

Figure 6. The low angle P-XRD of BTP@SBA (A). Reused BTP@SBA after five catalytic cycle (B).

## FT-IR

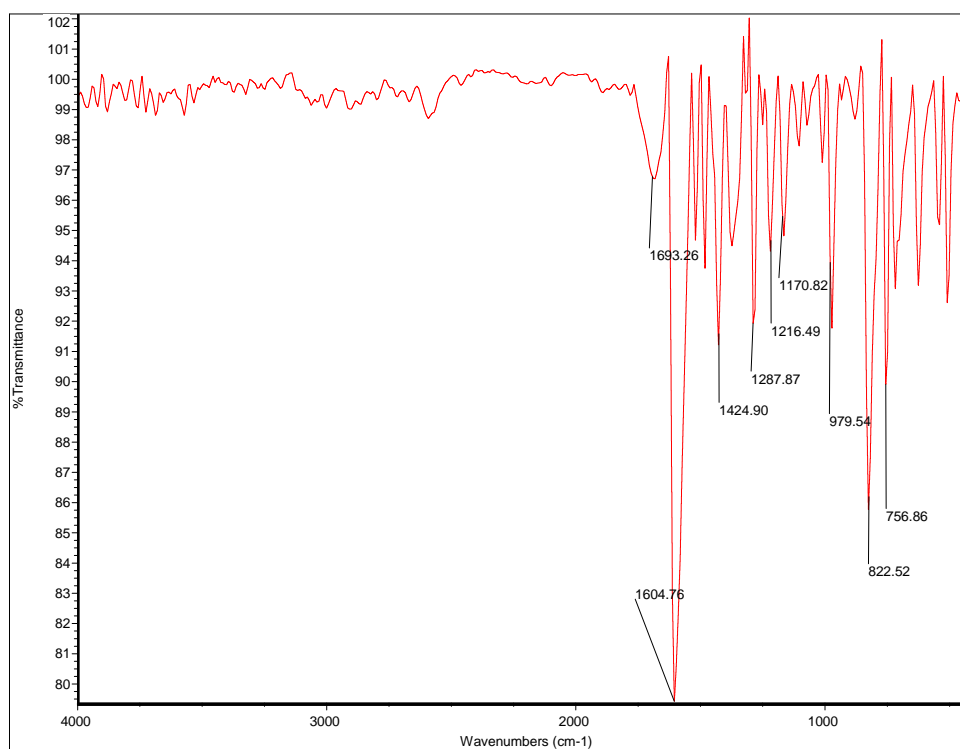

Figure 7. The schematic FT-IR spectrum of BTP

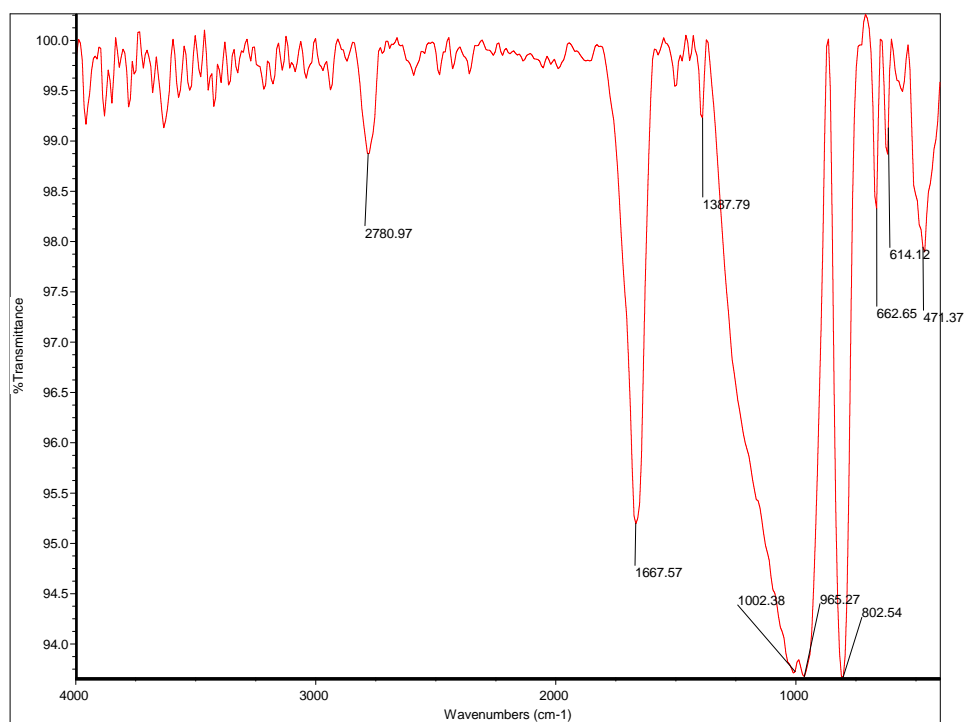

Figure 8. The schematic FT-IR spectrum of BTP@SBA-15

### Details of FT-IR spectra

| Entry | BTP                 | BTP@SBA                  |
|-------|---------------------|--------------------------|
| 1     | 703 (C-S)           | 802 (Si-O) <sup>a</sup>  |
| 2     | 1604 (Aromatic C-H) | 1002 (Si-O) <sup>b</sup> |
| 3     | 1693 (C=O)          | 1667 (C=O)               |
| 4     | 2820 (Acetate C-H)  | 2780 (Acetate C-H)       |

a: Bending

b: Stretching

### TGA

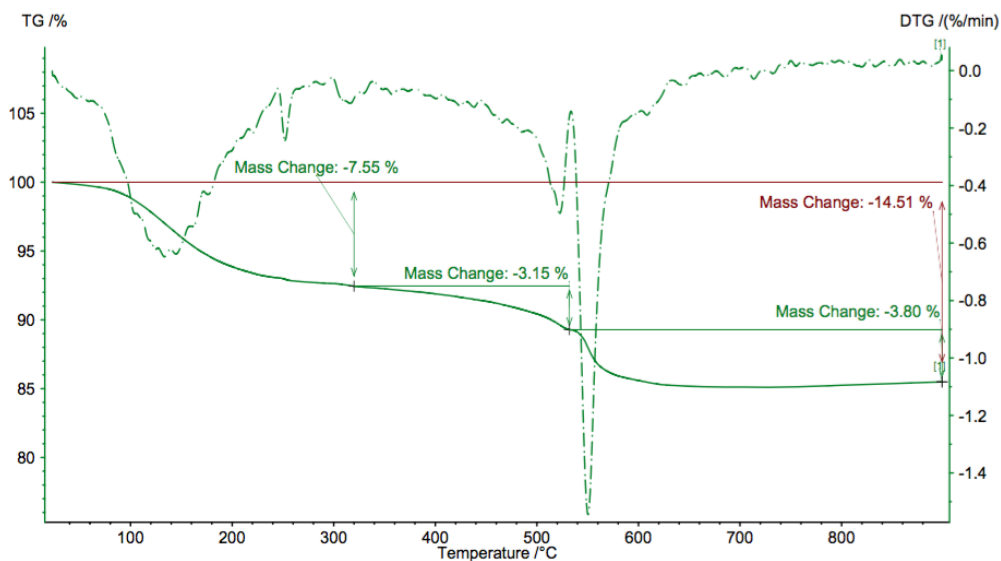

Figure 9. The TGA of BTP@SBA up to 900 °C..

### BET curve

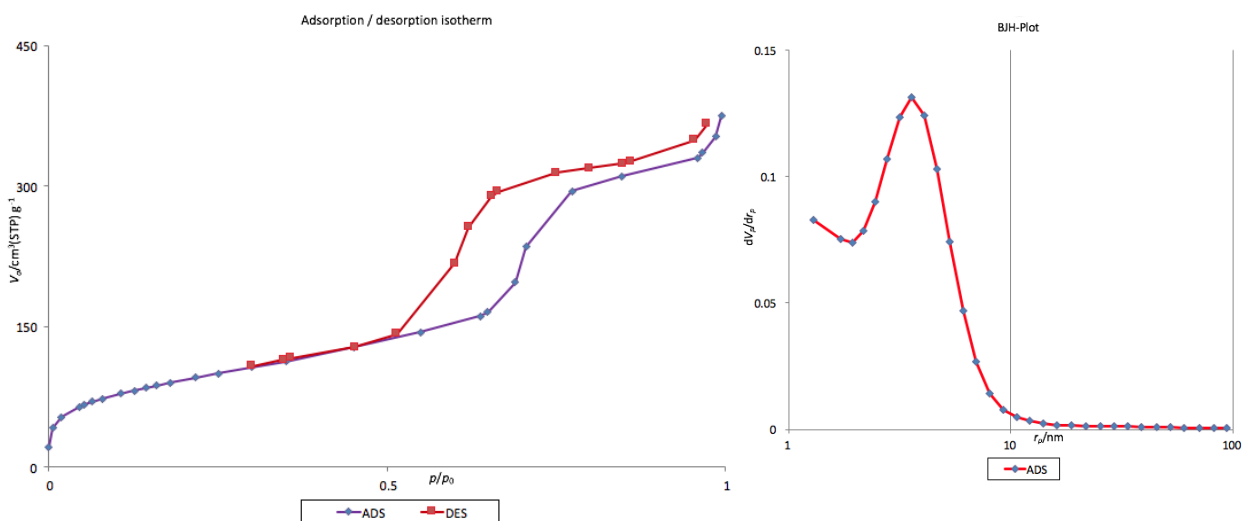

Figure 10. The Bet curve of BTP@SBA (A) and BJH distribution curve of BTP@SBA (B)

## BET results

The N<sub>2</sub>(g) adsorption analysis of BTP@SBA and fresh SBA-15.

|                                    | BET plot of (4) | Fresh SBA-15 | Unit                                     |
|------------------------------------|-----------------|--------------|------------------------------------------|
| $V_m$                              | 75.661          | 103.743      | [cm <sup>3</sup> (STP) g <sup>-1</sup> ] |
| $a_{s,BET}$                        | 329.31          | 726.6        | [m <sup>2</sup> g <sup>-1</sup> ]        |
| Total pore volume( $p/p_0=0.990$ ) | 0.5629          | 0.9842       | [cm <sup>3</sup> g <sup>-1</sup> ]       |
| Mean pore diameter                 | 6.8368          | 9.2687       | [nm]                                     |

## SEM

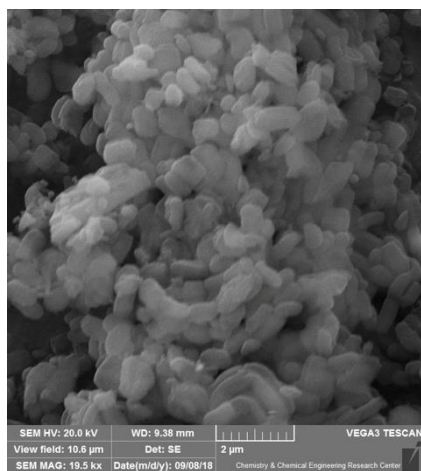

(A)

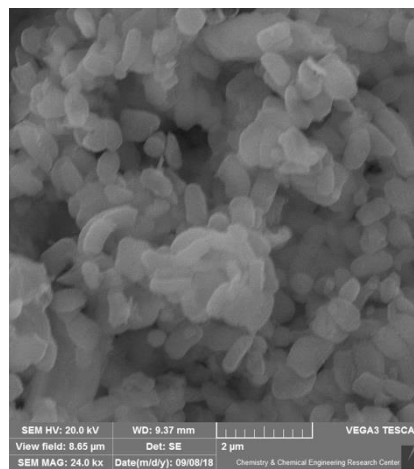

(B)

Figure 11. The SEM image of BTP@SBA (A) and Reused BTP@SBA after 5 catalytic cycle (B)

## TEM

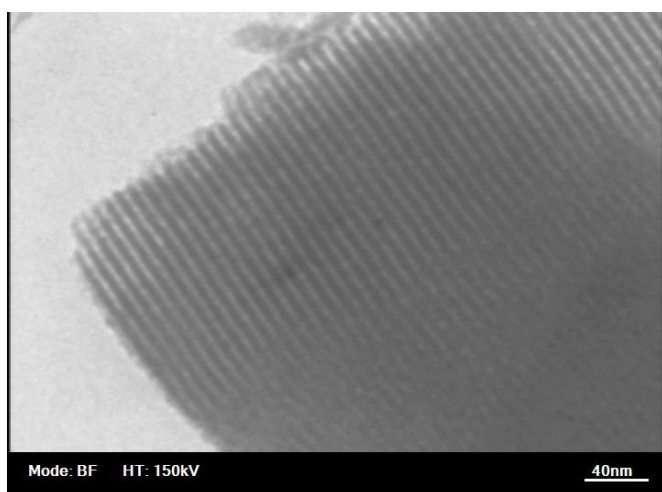

(A)

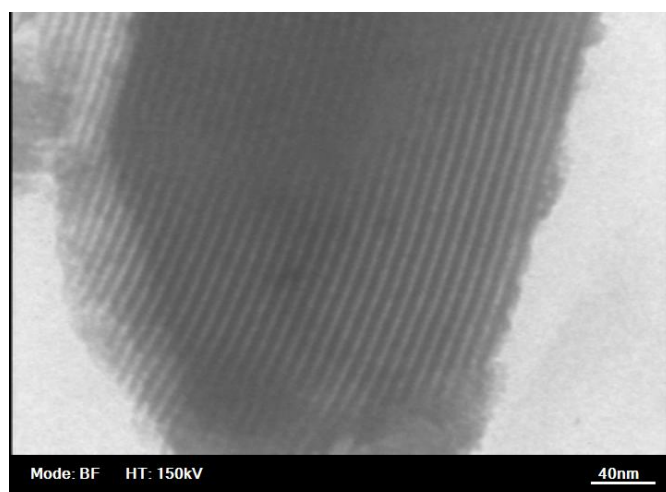

(B)

Figure 12. The TEM of BTP@SBA along to pore axis of BTP@SBA (B) and reused BTP@SBA after 5 catalytic cycle (B)

### Proposed mechanism of MIr catalyzed by BTP@SBA

The proposed mechanism of MIr catalyzed by BTP@SBA starts by exchange of  $\text{OAc}^-$  by DMSO as solvent, that is common in palladium coordinated acetate moieties<sup>7</sup>. It is noticeable, all of the reports of MIr mostly work in DMSO/ $\text{H}_2\text{O}$  solvent conditions. The oxidative addition of Ph-I to Pd(II) center afford Pd(IV) as octahedral six coordinated complex (c). Subsequently, the isocyanide coordinate to Pd(IV) and DMSO get out from the coordination sphere (d). By the migratory isocyanide insertion to Pd-Ph and reinstallation of DMSO the coordinated  $\text{PhC}=\text{NR}$  moiety obtained. The DFT calculation MIr catalyzed by  $\text{PdCl}_2$  elucidate the  $\text{OH}^-$  substitution by iodide to form Pd-OH intermediate<sup>8</sup>. The iminol or imidic acid form attained after reductive elimination of  $\text{OH}^-$  and  $\text{PhC}=\text{NR}$  group. The resulting MIr was taken by the tautomerization of imidic acid to amide. Notably, the paladacycle (b) was proposed as actual catalyst of MIr.

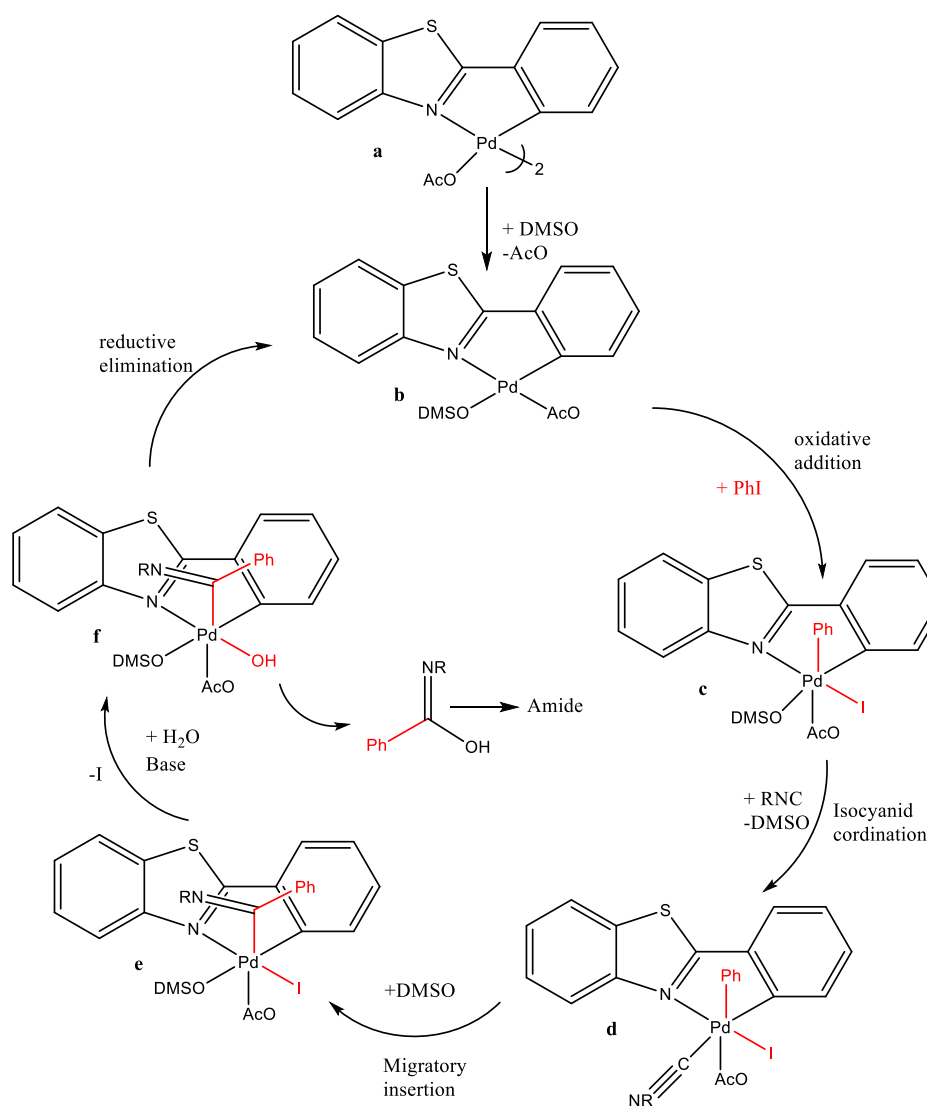

Figure 13. Proposed mechanism of BTP@SBA catalyze MIr via Pd(+2)/Pd(+4) catalytic cycle

## Experimental

### Materials and measurement

All chemicals were purchased from Merck or Aldrich and were used without additional distillation. FT-IR spectra were taken with a Bomem FT-IR MB spectrometer. The NMR spectra were recorded on a BRUKER DRX-300 AVANCE spectrometer. Powder X-RAY Diffraction data were collected on a STOE STADI P with scintillation detector, secondary monochromator and Cu-Ka1 radiation ( $\lambda = 1.5406 \text{ \AA}$ ). EDS characterizations of BTP@SBA were performed using an electron microscopy Philips XL-30 ESEM. Transmission Electron Microscopy characterization of BTP@SBA was performed using a transmission microscope Philips CM-30 with an accelerating voltage of 150 kV. The concentration of Pd was estimated using Shimadzu AA-680 flame atomic absorption spectrophotometer. The sorption analysis was recorded by micromeritics Auto-chem II 2920. Furthermore, The TGA was accomplished by Perkin Elmer TGA/DSC. Lastly, the CHNS content was estimated by Perkin Elmer 2400 series.

The X-ray diffraction measurements were made with a STOE IPDS-II diffractometer with graphite-monochromated MoKa radiation. Cell constants and an orientation matrix for data collection were obtained by least-squares refinement of diffraction data from 6743 and 3408 unique reflections for BTP. Data were collected at a temperature of 298(2) K to a maximum  $2\theta$  value of 51.988 and in a series of  $\omega$  scans in 18 oscillations and integrated using the Stoe X-Area software package. The data were corrected for Lorentz and Polarizing effects. The structures were solved by direct methods and refined on F<sup>2</sup> by full-matrix least-squares procedure. All hydrogen atoms were added at ideal positions and constrained to ride on their parent atoms, with  $U_{iso}(H) = 1.2 U_{eq}$ . All refinements were performed by using the X-STEP32 crystallographic software package. Complete crystallographic data for BTP has been deposited with the Cambridge Crystallographic Data Centre as supplementary publication No. CCDC 1968870. These data can be obtained free of charge from The Cambridge Crystallographic Data Centre via [www.ccdc.cam.ac.uk/data\\_request/cif](http://www.ccdc.cam.ac.uk/data_request/cif).

### Synthesis of 4-Hydroxy 2-Phenyl Benzothiazole (3)

The 2-aminothiophenol (1mmol) and 4-hydroxybenzaldehyde (1mmol) stirred in MeOH at room temperature to afford yellow imine sediment. Subsequently,  $\text{NH}_2\text{SO}_3\text{H}$  (10 mol%) was added to the reaction mixture. After 4h, light yellow sediment achieved and recrystallized in MeOH/H<sub>2</sub>O to afford pure product. Melting point: 227-230 °C. <sup>1</sup>H NMR (300 MHz, DMSO): 10.22 (1H, s, OH), 8.06 (1H, d, <sup>3</sup>J<sub>HH</sub> = 9.0 Hz, H-Ar), 7.95 (3H, m, H-Ar), 7.48 (1H, t, <sup>3</sup>J<sub>HH</sub> = 9.0 Hz, H-Ar), 7.38 (1H, t, <sup>3</sup>J<sub>HH</sub> = 9.0 Hz, H-Ar), 6.93 (2H, d, <sup>3</sup>J<sub>HH</sub> = 9.0 Hz, H-Ar). Anal. Calcd for C<sub>13</sub>H<sub>9</sub>NOS: C, 68.70; H, 3.99; N, 6.16. Found: C, 66.27; H, 4.15; N, 6.05.

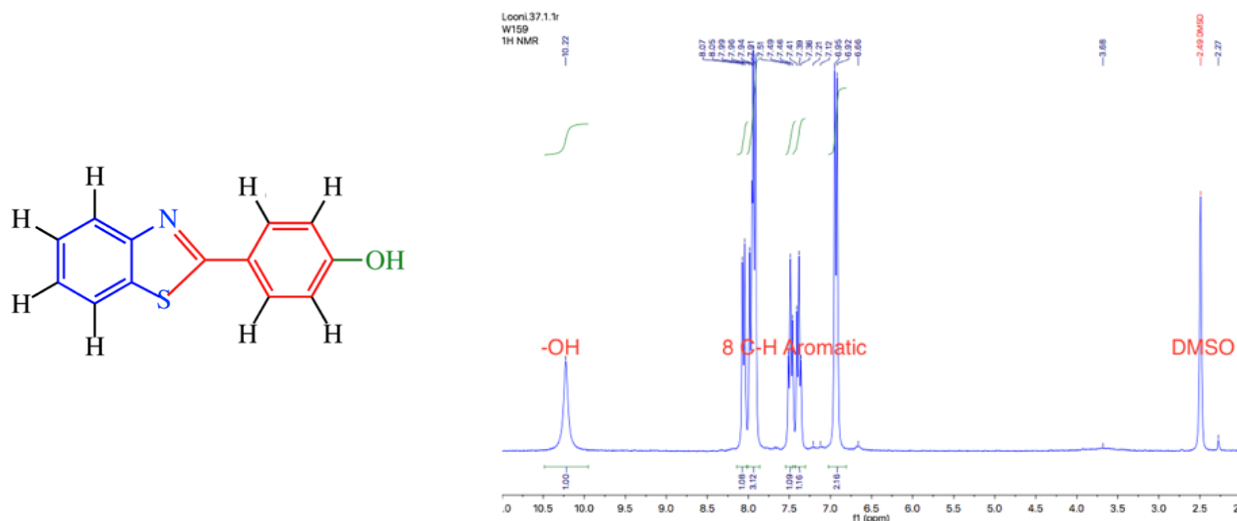

### Synthesis of 4-hydroxy 2-phenyl benzothiazole palladacycle (BTP)

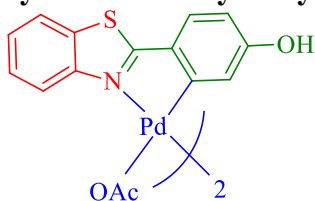

The dimeric acetate palladacycle (**BTP**) was obtained by the reaction of (**3**) (1mmol) and Pd(OAc)<sub>2</sub> (1mmol) in HOAc under reflux conditions and inert atmosphere for 2h. Afterward, the excess amount of N-hexane was added to the reaction mixture and the sediment gained by simple filtration as greyish-green color. <sup>1</sup>H NMR (300 MHz, DMSO). 9.39 (1H, s, OH), 7.61 (1H, d, <sup>3</sup>J<sub>HH</sub> = 9.0 Hz, H-Ar), 7.50 (1H, d, <sup>3</sup>J<sub>HH</sub> = 9.0 Hz, H-Ar), 7.19 (2H, m, H-Ar), 6.71 (1H, d, <sup>3</sup>J<sub>HH</sub> = 9.0 Hz, H-Ar), 5.81 (1H, s, H-Ar), 5.70 (1H, d, <sup>3</sup>J<sub>HH</sub> = 9.0 Hz, H-Ar), 2.18 (3H, s, Me). MS (EI, 70 eV) m/z: 391 (M<sup>+</sup>/2). Anal. Calcd for C<sub>30</sub>H<sub>22</sub>N<sub>2</sub>O<sub>6</sub>Pd<sub>2</sub>S<sub>2</sub>: C, 45.99; H, 2.83; N, 3.58. Found: C, 45.68; H, 2.71; N, 3.41.

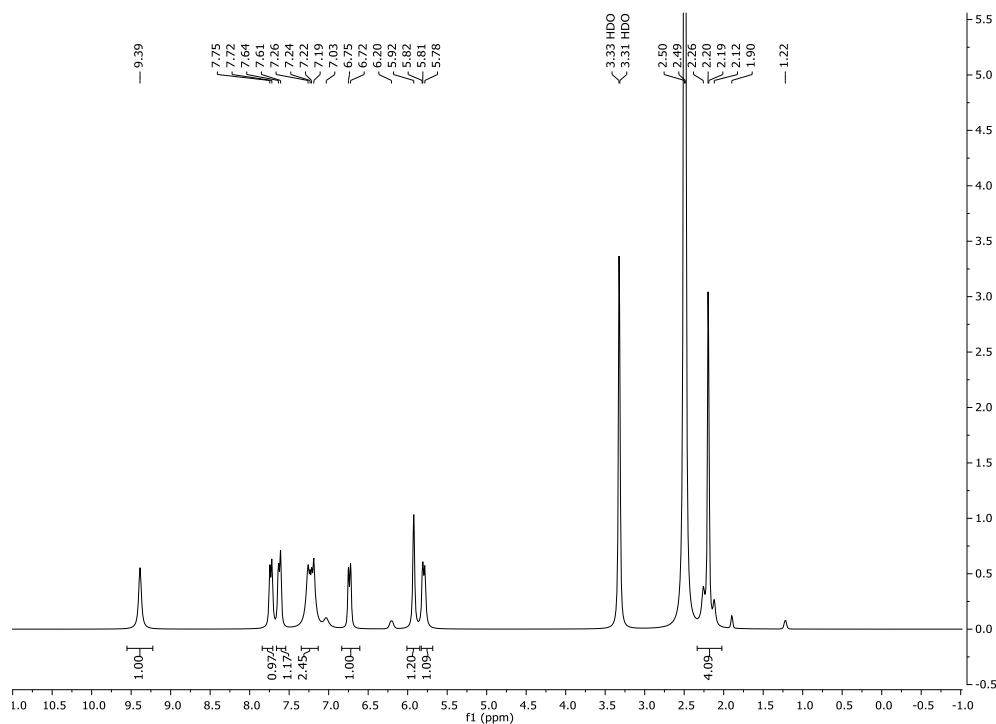

### Mass Spectrum of BTP

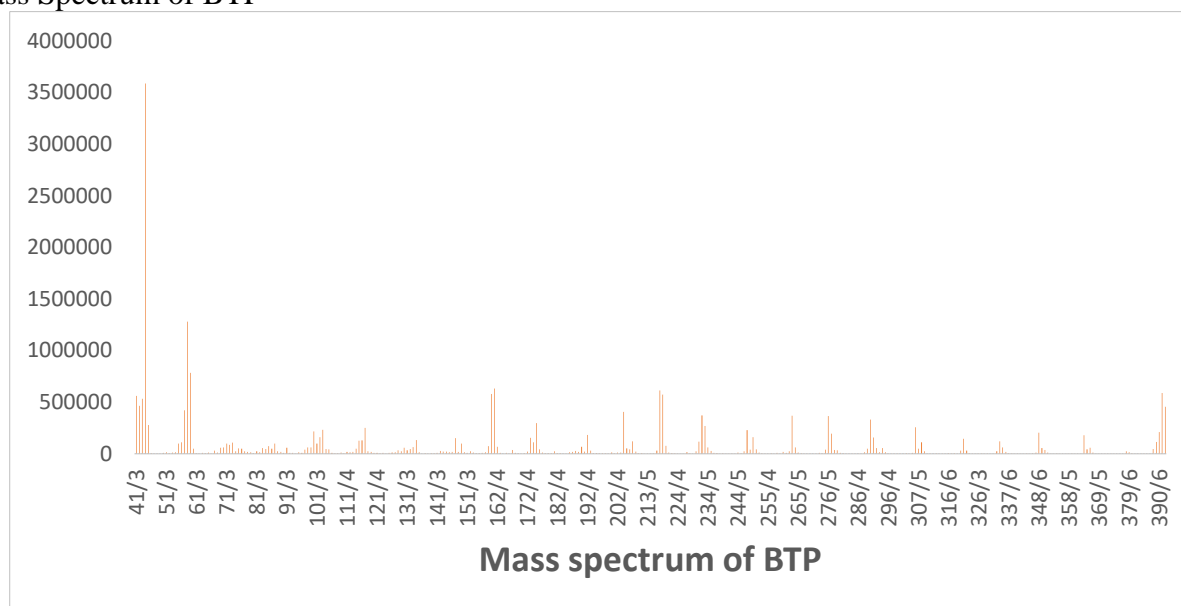

Figure 14. Mass spectrum of BTP

### Synthesis of chlorinated SBA-15

The fresh SBA-15 was kept overnight under 120 °C to evaporate adsorbed water. The SBA-Cl was obtained by chlorination of dried SBA-15 nanoparticles. SBA-15 (3 g) was refluxed in 60 mlit  $\text{SOCl}_2$  in a round bottomed flask fortified with a drying tube, condenser and inert atmosphere for 24h. The excess amount of thionyl chloride was distilled off and the resulting solid product was flame-dried as light-greyish color and stored in a sealed vessel under  $\text{N}_2(\text{g})$ .

### Synthesis of BTP directly bonded to SBA-15 (BTP@SBA)

The BTP (0.5 mmol, 0.39 gr) was dissolved in 40 mL dried DMF. The soluble of BTP was added drop wise to the round bottom flask containing dried chlorinated SBA-15 under  $\text{N}_2(\text{g})$ . The reaction accompanied by emission of gaseous  $\text{HCl}$ . The reaction was stirred for 24h at room temperature. Then, the 60 ml of MeOH was added to the reaction. Afterward, the BTP@SBA was separated by centrifuge and washed several times with MeOH and  $\text{H}_2\text{O}$  in order to neutralize the PH.

### General procedure for the migratory isocyanide insertion reaction (MIIR)

A mixture of arylhalides (1mmol), isocyanides (1.2 mmol) and  $\text{Cs}_2\text{CO}_3$  (1mmol) in presence of 0.5 mol% of BTP@SBA in DMSO/ $\text{H}_2\text{O}$  (2 mL, 1:1) was stirred at 100 °C for 24h. After completion of the reaction (TLC), the reaction mixture was cooled to room temperature. Then, MeOH (5 mL) was added to the reaction mixture and the solid BTP@SBA was separated by filtration. The filtrate was

evaporated under vacuum and the product was purified by Column chromatography (EtOAc/n-Hexane (3/7)).

All of the synthesized amide are known compounds.<sup>9-13</sup>

**N-(tert-butyl)benzamide (6a).**

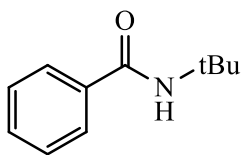

Cream powder; m.p. 131-133 °C. IR (KBr) ( $\nu_{\text{max}}$  / $\text{cm}^{-1}$ ): 3327, 3064, 2975, 1642, 1449.  $^1\text{H}$  NMR (300 MHz,  $\text{CDCl}_3$ )  $\delta$  1.51 (s, 9H), 6.10 (brs, 1H), 7.30 -7.51 (m, 3H), 7.71-7.83 (m, 2H).  $^{13}\text{C}$  NMR (75 MHz,  $\text{CDCl}_3$ )  $\delta$  28.9, 51.6, 126.8, 128.4, 131.0, 135.9, 167.0.

**N-cyclohexylbenzamide (6b).**

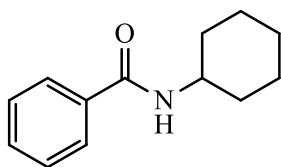

White powder; m.p. 151-153 °C. IR (KBr) ( $\nu_{\text{max}}$  / $\text{cm}^{-1}$ ): 3301, 3215, 2938, 1659.  $^1\text{H}$  NMR (300 MHz,  $\text{CDCl}_3$ )  $\delta$  1.21-1.52 (m, 6H), 1.71-1.83 (m, 2H), 2.01-2.12 (m, 2H), 4.00-4.10 (m, 1H), 6.10 (brs, 1H), 7.31-7.52 (m, 3H), 7.81-7.83 (m, 2H).  $^{13}\text{C}$  NMR (75 MHz,  $\text{CDCl}_3$ )  $\delta$  24.9, 25.6, 33.3, 48.7, 126.8, 128.5, 131.2, 135.1, 166.6.

**N-(2,4,4-trimethylpentan-2-yl)benzamide (6c).**

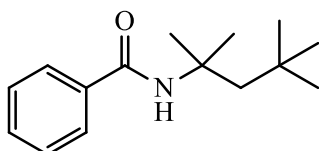

White powder; m.p. 70-72 °C. IR (KBr) ( $\nu_{\text{max}}$  / $\text{cm}^{-1}$ ): 3311, 2920, 1650, 1456.  $^1\text{H}$  NMR (300 MHz,  $\text{CDCl}_3$ )  $\delta$  1.01 (s, 9H), 1.50 (s, 6H), 1.83 (s, 2H), 5.96 (brs, 1H), 7.36-7.48 (m, 3H), 7.67-7.68 (m, 2H).  $^{13}\text{C}$  NMR (75 MHz,  $\text{CDCl}_3$ )  $\delta$  29.7, 31.5, 31.7, 51.8, 55.1, 126.1, 128.4, 130.5, 135.7, 166.3.

**N-(2,6-dimethylphenyl)benzamide (6d).**

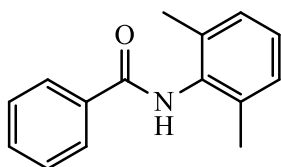

Yellow powder; m.p. 158-160 °C. IR (KBr) ( $\nu_{\text{max}}$  / $\text{cm}^{-1}$ ): 3285, 1654, 1534, 1465.  $^1\text{H}$  NMR (300 MHz,  $\text{CDCl}_3$ )  $\delta$  2.14 (s, 9H), 4.64 (brs, 1H), 7.13 (s, 3H), 7.43 (d,  $J$  = 9.1 Hz, 2H), 7.95 (d,  $J$  = 9.1 Hz, 2H).  $^{13}\text{C}$  NMR (75 MHz,  $\text{CDCl}_3$ )  $\delta$  18.5, 127.2, 127.4, 128.3, 131.8, 133.8, 134.3, 135.5, 165.8.

**N-cyclohexyl-4-methylbenzamide (6e).**

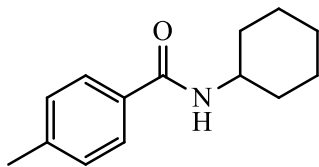

Cream powder; m.p. 160-162 °C. IR (KBr) ( $\nu_{\text{max}}$  / $\text{cm}^{-1}$ ): 3323, 2918, 1643, 1556.  $^1\text{H}$  NMR (300 MHz,  $\text{CDCl}_3$ )  $\delta$  1.31-1.45 (m, 6H), 1.61-1.66 (m, 2H), 1.72-2.01 (m, 2H), 2.41 (s, 3H), 4.01 (m, 1H), 6.21 (brs, 1H), 7.21 (d,  $J = 7.7$  Hz, 2H), 7.70 (d,  $J = 7.7$  Hz, 2H).  $^{13}\text{C}$  NMR (75 MHz,  $\text{CDCl}_3$ )  $\delta$  21.4, 25.0, 25.6, 33.2, 48.6, 126.9, 129.1, 132.2, 141.5, 166.6.

**N-cyclohexyl-2-methylbenzamide (6f).**

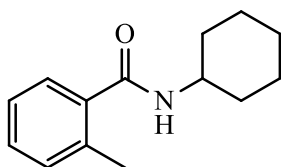

White powder; m.p. 157-159 °C. IR (KBr) ( $\nu_{\text{max}}$  / $\text{cm}^{-1}$ ): 3334, 2932, 2843, 1662, 1565.  $^1\text{H}$  NMR (300 MHz,  $\text{CDCl}_3$ )  $\delta$  1.22-1.43 (m, 6H), 1.71-1.83 (m, 2H), 1.86– 2.10 (m, 2H), 2.22 (s, 3H), 4.02 (m, 1H), 6.53 (brs, 1H), 7.21-7.43 (m, 4H).  $^{13}\text{C}$  NMR (75 MHz,  $\text{CDCl}_3$ )  $\delta$  19.7, 24.9, 25.6, 48.5, 125.7, 126.6, 129.6, 130.9, 135.7, 137.0, 169.3.

**N-(tert-butyl)-4-methoxybenzamide (6g).**

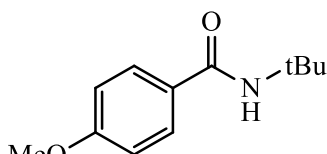

White powder; m.p. 116-118 °C. IR (KBr) ( $\nu_{\text{max}}$  / $\text{cm}^{-1}$ ): 3348, 3074, 2856, 1665, 1553, 1450.  $^1\text{H}$  NMR (300 MHz,  $\text{CDCl}_3$ )  $\delta$  1.51 (s, 9H), 3.83 (s, 3H), 6.01 (brs, 1H), 6.91-6.93 (m, 2H), 7.71-7.73 (m, 2H).  $^{13}\text{C}$  NMR (75 MHz,  $\text{CDCl}_3$ )  $\delta$  28.9, 51.4, 55.4, 113.6, 128.2, 128.5, 161.8, 166.5.

**N-cyclohexyl-4-methoxybenzamide (6h).**

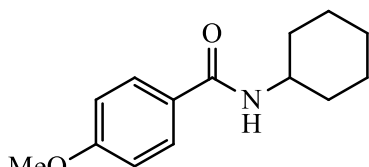

Cream powder; m.p. 158-160-228 °C. IR (KBr) ( $\nu_{\text{max}}$  / $\text{cm}^{-1}$ ): 3392, 2850, 1667.  $^1\text{H}$  NMR (300 MHz,  $\text{CDCl}_3$ )  $\delta$  1.24-1.53 (m, 6H), 1.63-1.77 (m, 2H), 1.81– 2.02 (m, 2H), 3.91 (s, 3H), 4.03 (m, 1H), 6.22 (brs, 1H), 6.92 (d,  $J = 7.9$  Hz, 2H), 7.73 (d,  $J = 7.9$  Hz, 2H).  $^{13}\text{C}$  NMR (75 MHz,  $\text{CDCl}_3$ )  $\delta$  25.0, 25.6, 33.3, 48.6, 55.4, 113.6, 127.4, 128.7, 161.9, 166.2.

**N-(tert-butyl)-4-nitrobenzamide (6i).**

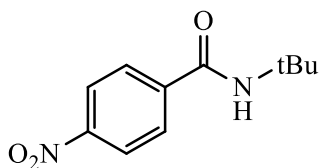

Yellow powder; m.p. 160-162 °C. IR (KBr) ( $\nu_{\text{max}}$  / $\text{cm}^{-1}$ ): 3321, 3062, 2970, 1645.  $^1\text{H}$  NMR (300 MHz,  $\text{CDCl}_3$ )  $\delta$  1.53 (s, 9H), 6.11 (brs, 1H), 7.93 (d,  $J$  = 8.1 Hz, 2H), 8.21 (d,  $J$  = 8.1 Hz, 2H).  $^{13}\text{C}$  NMR (75 MHz,  $\text{CDCl}_3$ )  $\delta$  28.7, 52.3, 123.7, 128.0, 141.6, 149.3, 164.9.

**4-acetyl-N-(tert-butyl)benzamide (6j).**

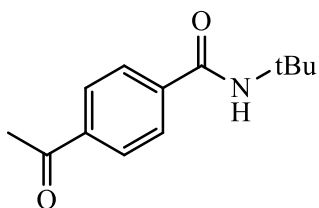

White powder; m.p. 140-142 °C. IR (KBr) ( $\nu_{\text{max}}$  / $\text{cm}^{-1}$ ): 3305, 2970, 1678, 1535.  $^1\text{H}$  NMR (300 MHz,  $\text{CDCl}_3$ )  $\delta$  1.50 (s, 9H), 2.61 (s, 3H), 6.12 (brs, 1H), 7.82 (d,  $J$  = 6.8 Hz, 2H), 8.02 (d,  $J$  = 6.8 Hz, 2H).  $^{13}\text{C}$  NMR (75 MHz,  $\text{CDCl}_3$ ) 26.8, 28.8, 52.0, 127.1, 128.4, 138.8, 139.8, 165.9, 197.5.

**4-acetyl-N-cyclohexylbenzamide (6k).**

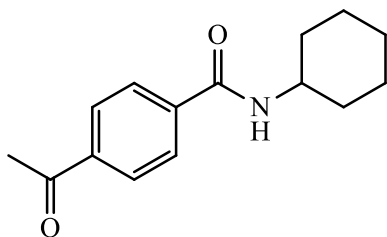

White powder; m.p. 196-198 °C. IR (KBr) ( $\nu_{\text{max}}$  / $\text{cm}^{-1}$ ): 3318, 2911, 1689, 1637, 1478.  $^1\text{H}$  NMR (300 MHz,  $\text{CDCl}_3$ )  $\delta$  1.31-1.71 (m, 6H), 1.74-1.91 (m, 2H), 1.97– 2.21 (m, 2H), 2.63 (s, 3H), 4.02 (m, 1H), 6.20 (brs, 1H), 7.83 (d,  $J$  = 7.6 Hz, 2H), 8.04 (d,  $J$  = 7.6 Hz, 2H).  $^{13}\text{C}$  NMR (75 MHz,  $\text{CDCl}_3$ )  $\delta$  24.9, 25.5, 26.8, 33.1, 49.0, 127.2, 128.4, 138.9, 139.0, 165.7, 197.5.

**N-(2,6-dimethylphenyl)-4-methylbenzamide (6l).**

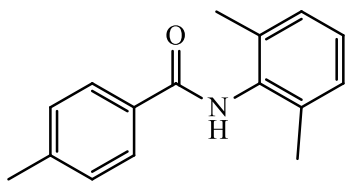

White powder; m.p. 163-165 °C. IR (KBr) ( $\nu_{\text{max}}$  / $\text{cm}^{-1}$ ): 3318, 2911, 1689, 1637, 1478.  $^1\text{H}$  NMR (300 MHz,  $\text{CDCl}_3$ )  $\delta$  2.43 (m, 6H), 2.62 (s, 3H), 7.15 (s, 3H), 7.16-7.19 (m, 2H), 7.20 (s, 1H), 7.86 (d,  $J$  = 6.5 Hz, 2H).  $^{13}\text{C}$  NMR (75 MHz,  $\text{CDCl}_3$ )  $\delta$  17.8, 21.4, 127.1, 127.4, 128.3, 129.0, 131.8, 133.8, 134.5, 135.5, 166.0.

**N-(tert-butyl)picolinamide (6m).**

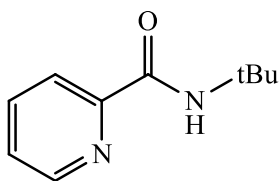

Yellow powder; m.p. 35-37 °C. IR (KBr) ( $\nu_{\text{max}}$  / $\text{cm}^{-1}$ ): 3367, 2961, 2920, 1685.  $^1\text{H}$  NMR (300 MHz,  $\text{CDCl}_3$ )  $\delta$  1.67 (s, 9H), 7.39 (t,  $J$  = 6.6 Hz, 1H), 7.79-7.84 (m, 1H), 7.96 (brs, 1H), 8.18 (d,  $J$  = 8.6 Hz, 1H), 8.53 (d,  $J$  = 4.5 Hz, 1H).  $^{13}\text{C}$  NMR (75 MHz,  $\text{CDCl}_3$ )  $\delta$  28.9, 51.7, 123.4, 125.6, 138.9, 148.7, 153.4, 164.3.

**N-cyclohexylpicolinamide (6n).**

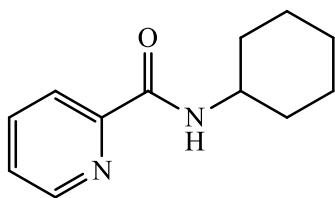

Cream powder; m.p. 55-57 °C. IR (KBr) ( $\nu_{\text{max}}$  / $\text{cm}^{-1}$ ) 3371, 2931, 2851, 1660.  $^1\text{H}$  NMR (300 MHz,  $\text{CDCl}_3$ )  $\delta$  1.31-1.67 (m, 6H), 1.71-1.85 (m, 2H), 1.87– 2.09 (m, 2H), 4.05 (m, 1H), 6.20 (brs, 1H), 7.41 (d,  $J$  = 7.2 Hz, 1H), 7.82-7.84 (m, 1H), 8.10 (brs, 1H), 8.22 (d,  $J$  = 7.6 Hz, 1H), 8.51 (d,  $J$  = 6.2 Hz, 1H).  $^{13}\text{C}$  NMR (75 MHz,  $\text{CDCl}_3$ )  $\delta$  24.9, 25.6, 33.1, 48.1, 122.2, 126.0, 137.3, 147.9, 150.2, 163.2.

**Reference**

1. M. J. Frisch, G. Trucks, H. Schlegel, G. Scuseria, M. Robb, J. Cheeseman, G. Scalmani, V. Barone, B. Mennucci and G. Petersson, Inc.: Wallingford, CT, 2009.
2. A. D. Becke, *The Journal of Chemical Physics*, 1993, 98, 5648-5652.
3. P. J. Hay and W. R. Wadt, *The Journal of chemical physics*, 1985, 82, 270-283.
4. T. Keith, *Journal*, 2010.
5. T. Lu and F. Chen, *Journal of computational chemistry*, 2012, 33, 580-592.
6. W. Humphrey, A. Dalke and K. Schulten, *Journal of molecular graphics*, 1996, 14, 33-38.
7. T. Diao, P. White, I. Guzei and S. S. Stahl, *Inorganic Chemistry*, 2012, 51, 11898-11909.
8. Y. Liang, Y. Ren, J. Jia and H.-S. Wu, *Journal of molecular modeling*, 2016, 22, 53.
9. H. Jiang, B. Liu, Y. Li, A. Wang and H. Huang, *Organic Letters*, 2011, 13, 1028-1031.
10. I. Yavari, M. Ghazanfarpour-Darjani and M. J. Bayat, *Tetrahedron letters*, 2014, 55, 4981-4982.
11. Y. Jo, J. Ju, J. Choe, K.H. Song, S. Lee, *S. J. Org. Chem.* 2009, 74, 6358.
12. G. Bechara, W. S. Bechara, A. B. Charette, *J. Am. Chem. Soc.* 2010, 132, 12817.
13. M. Malacarne, S. Protti, M. Fagnoni, *Advanced Synthesis and Catalysis*, 2017, 359, 3826.

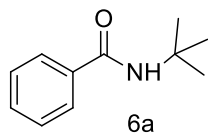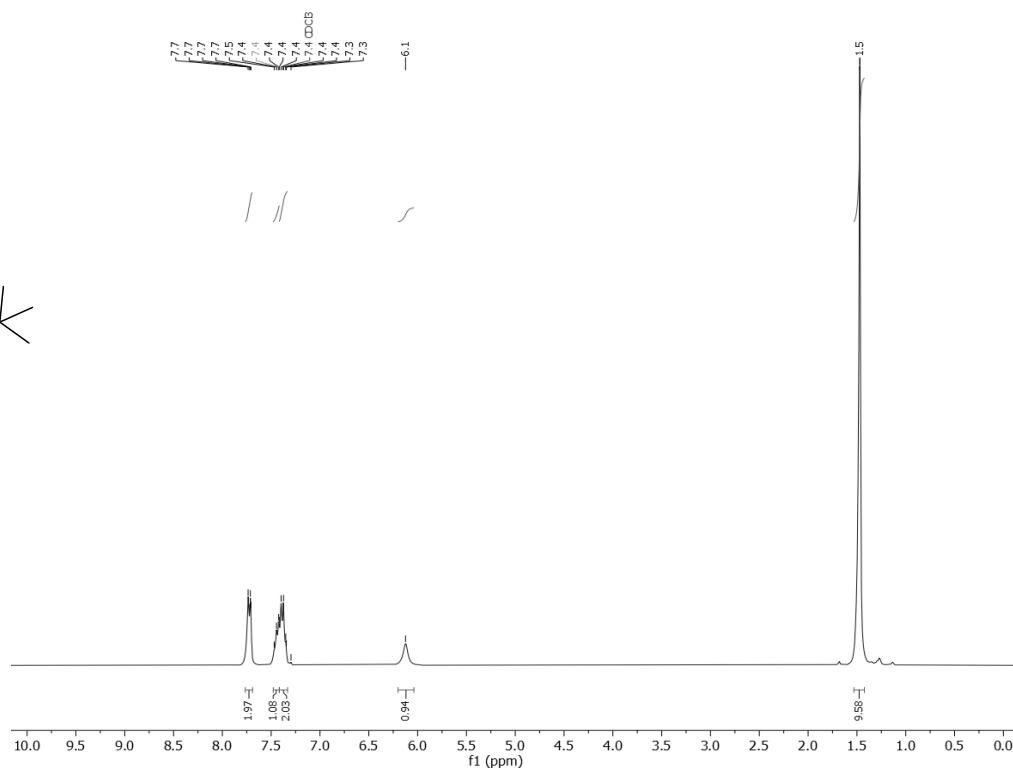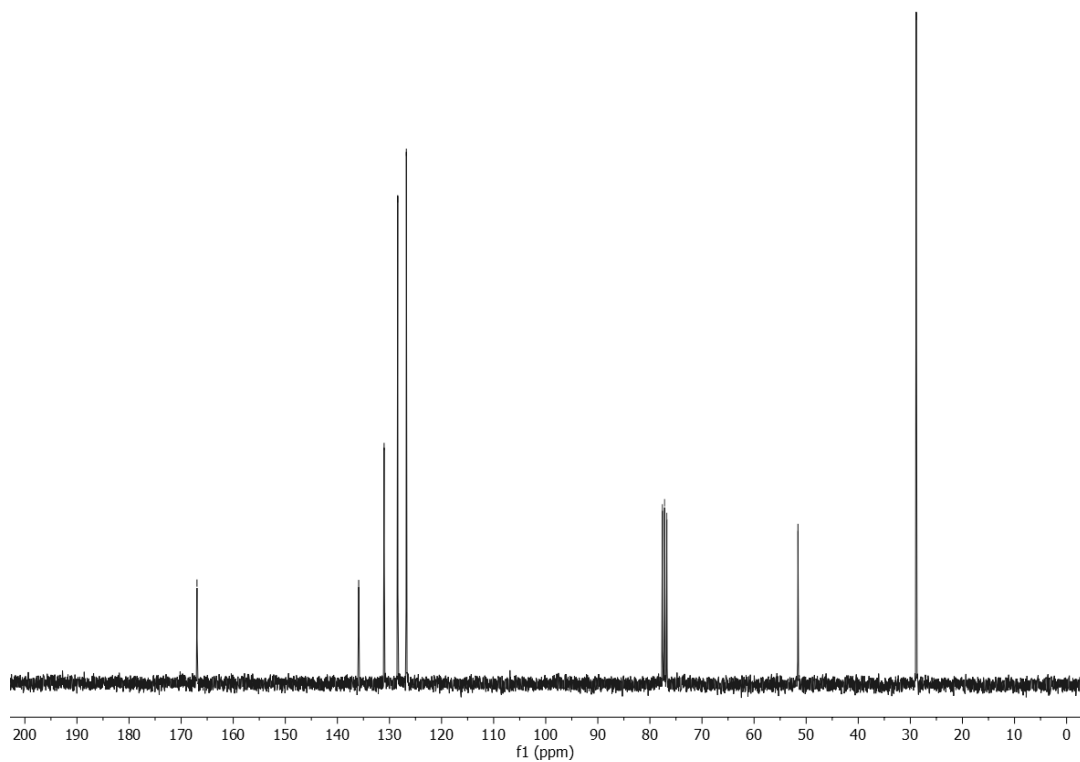

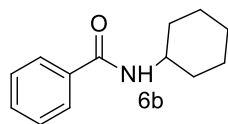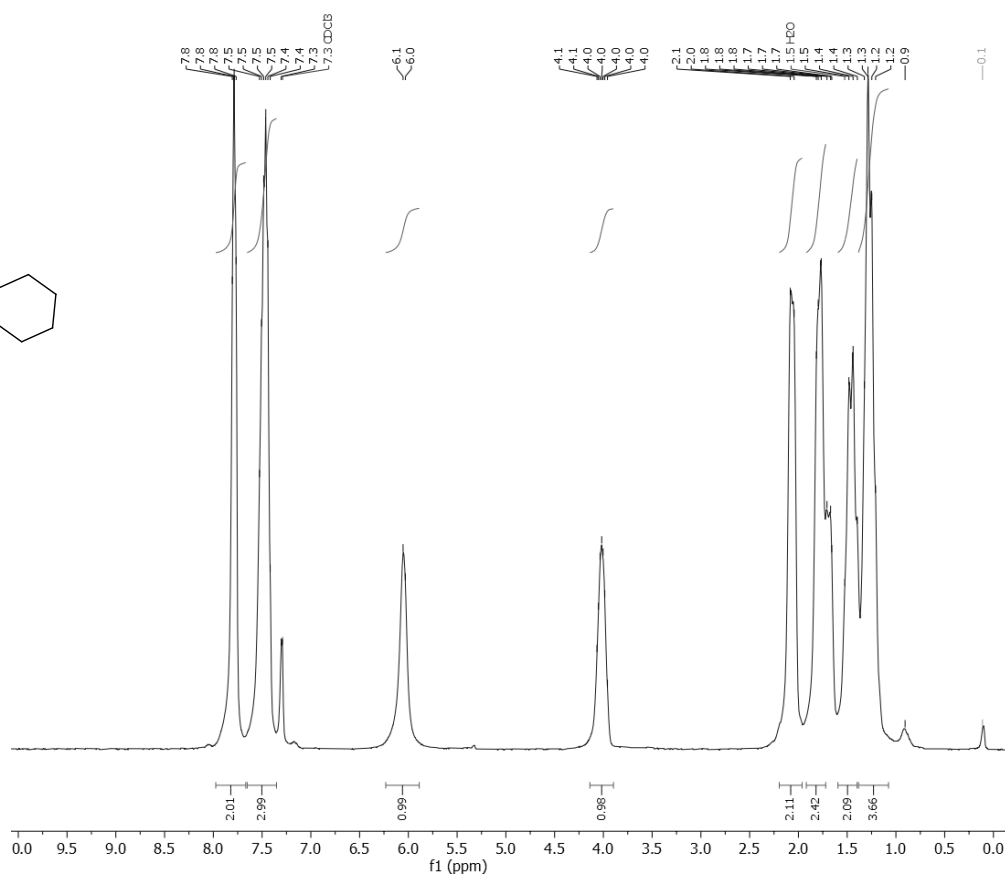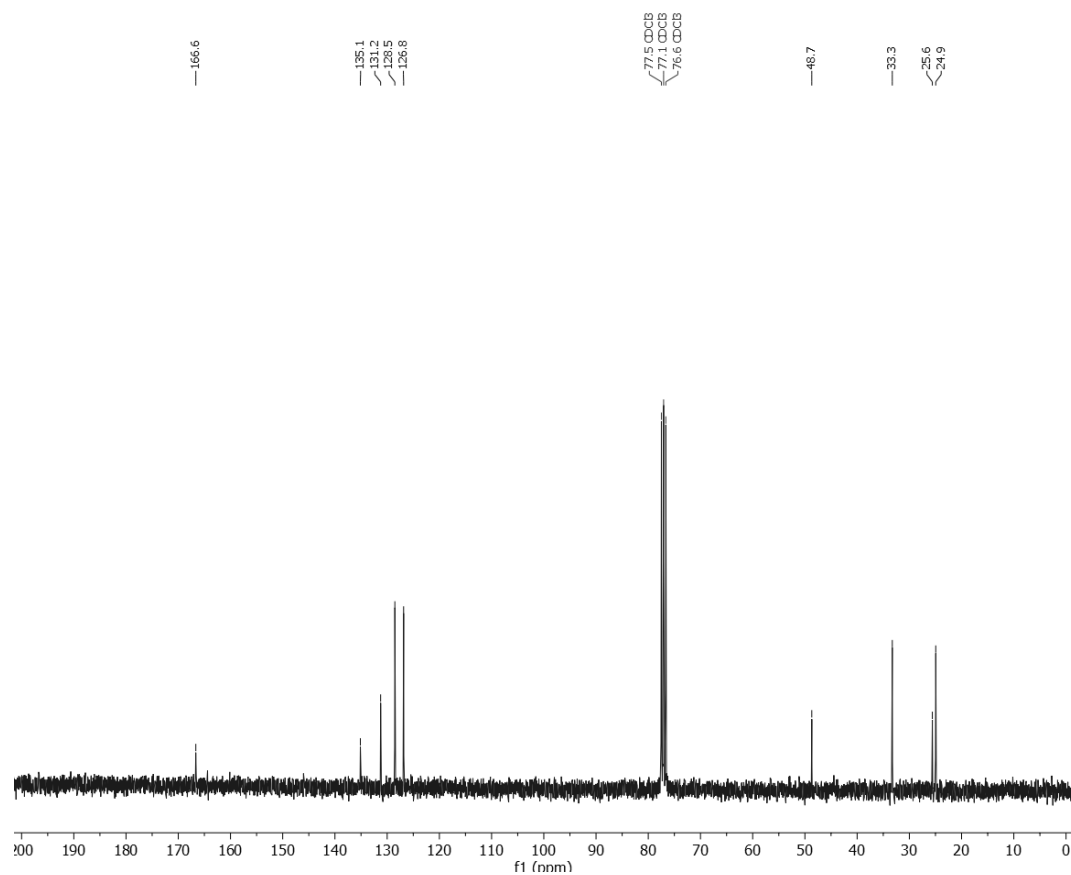

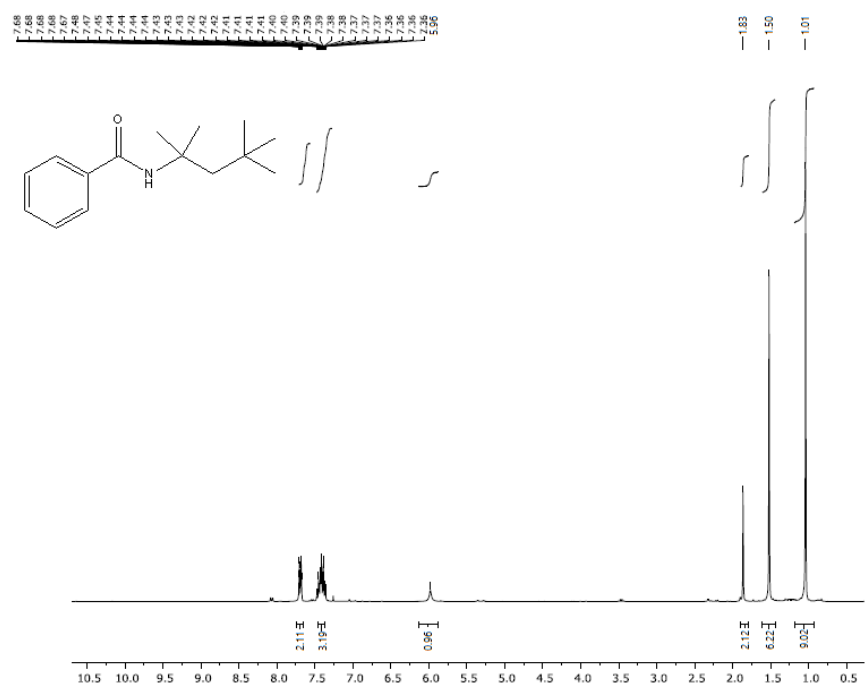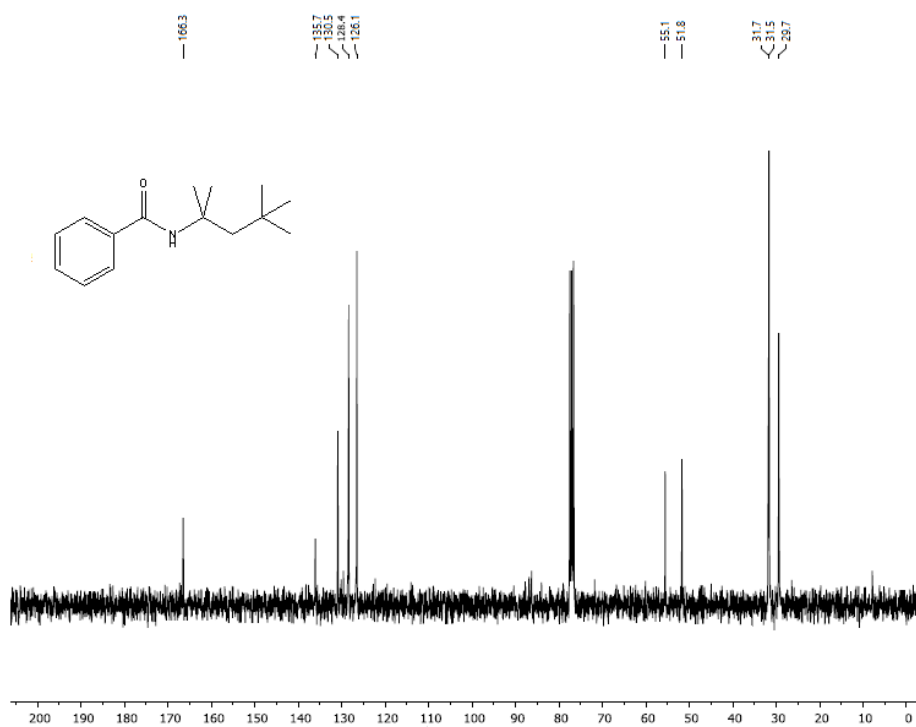

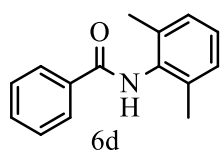

Ion/E  
E  
1H NMR

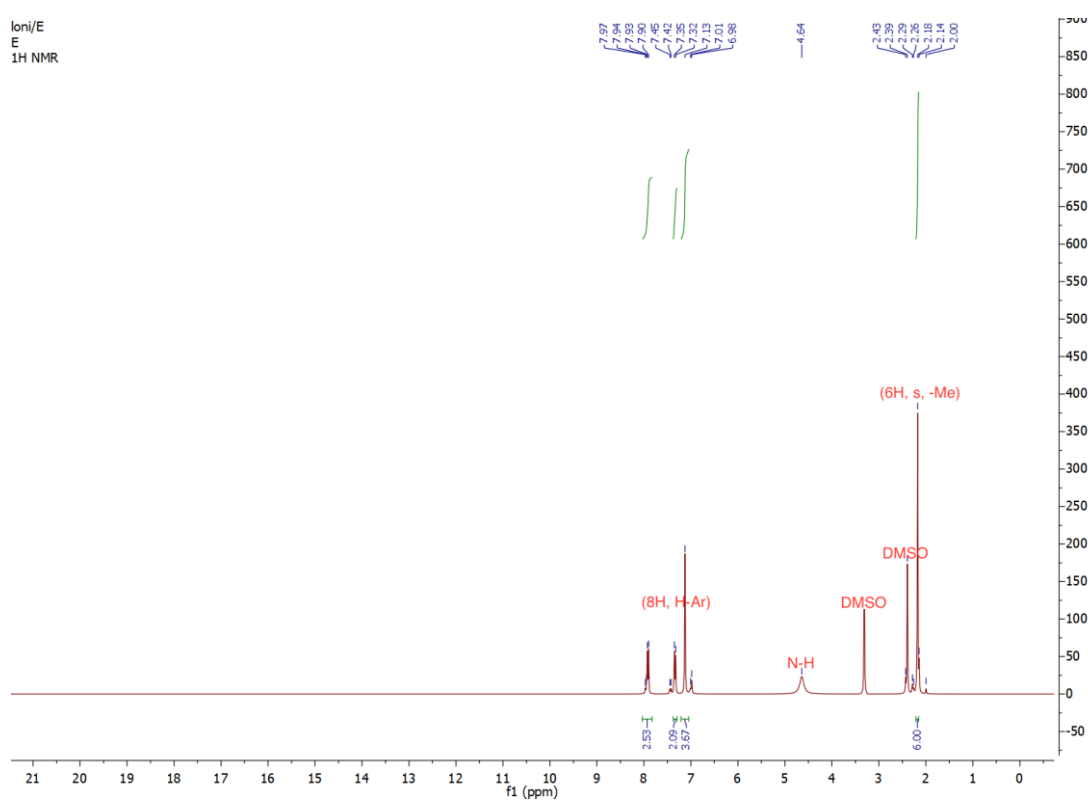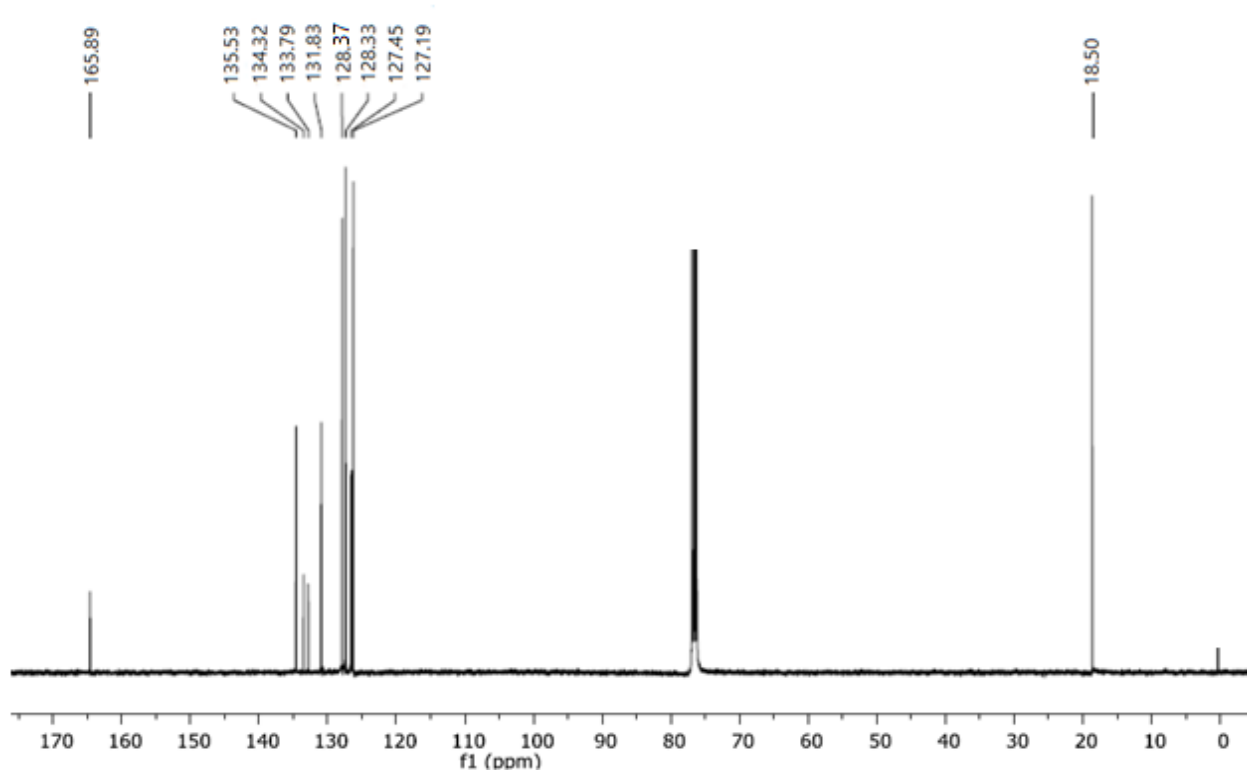

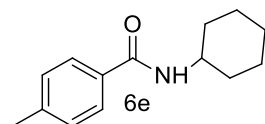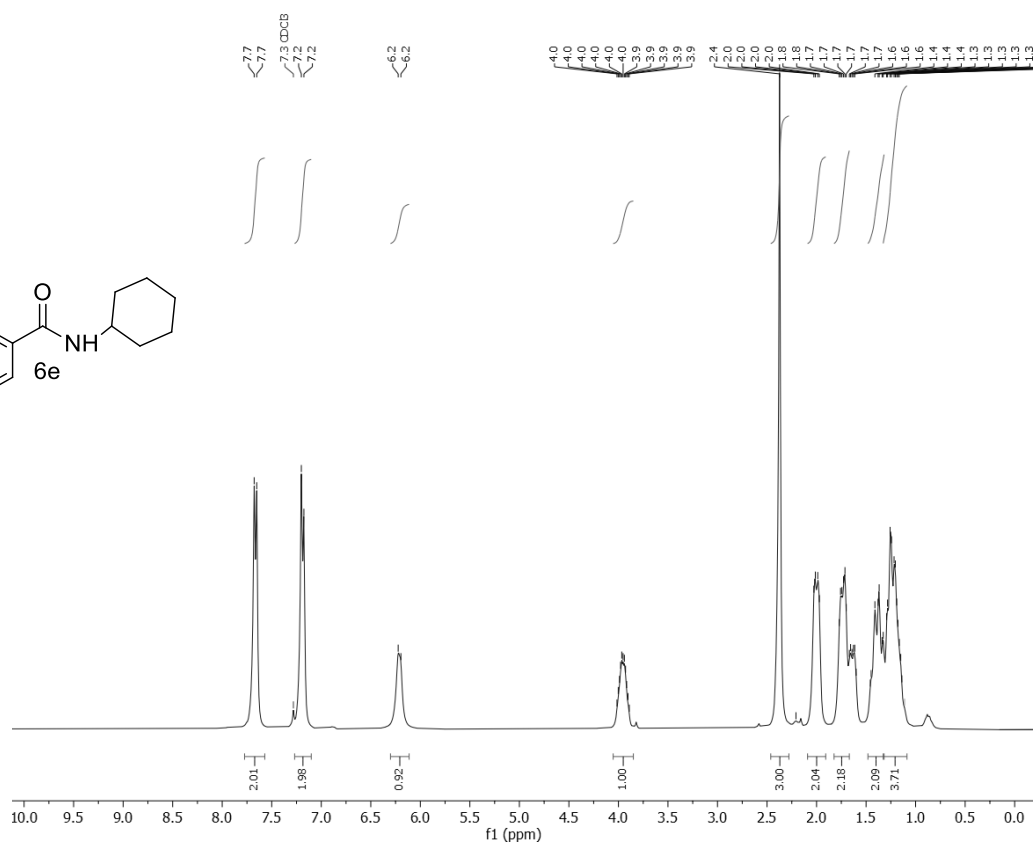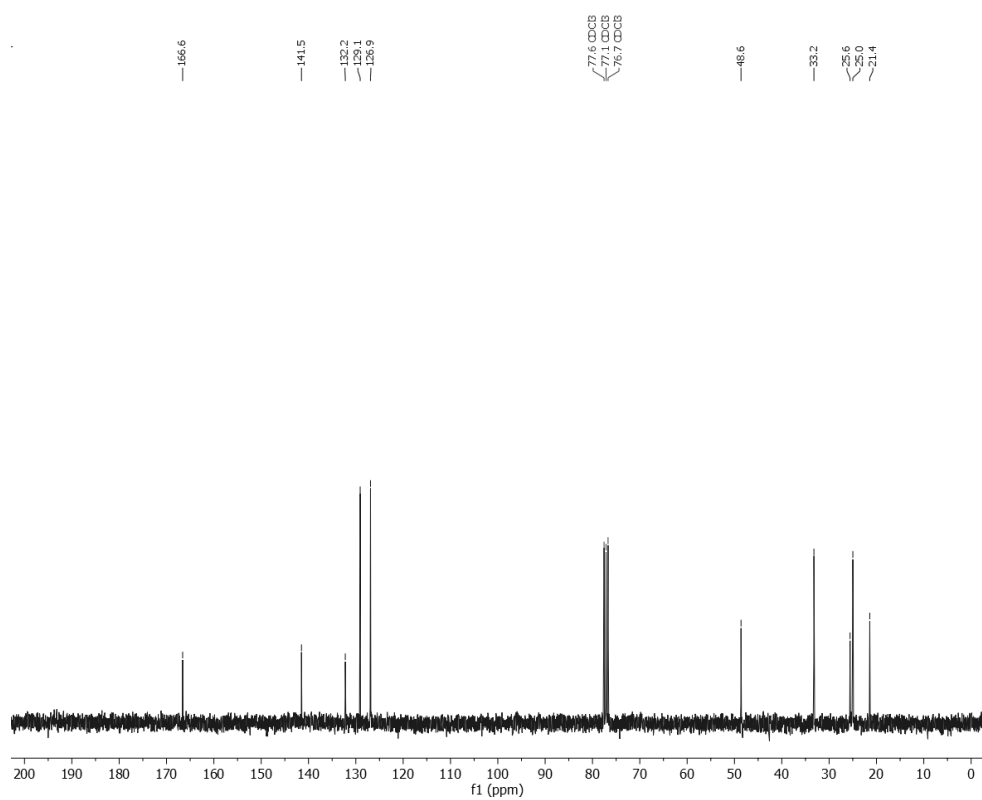

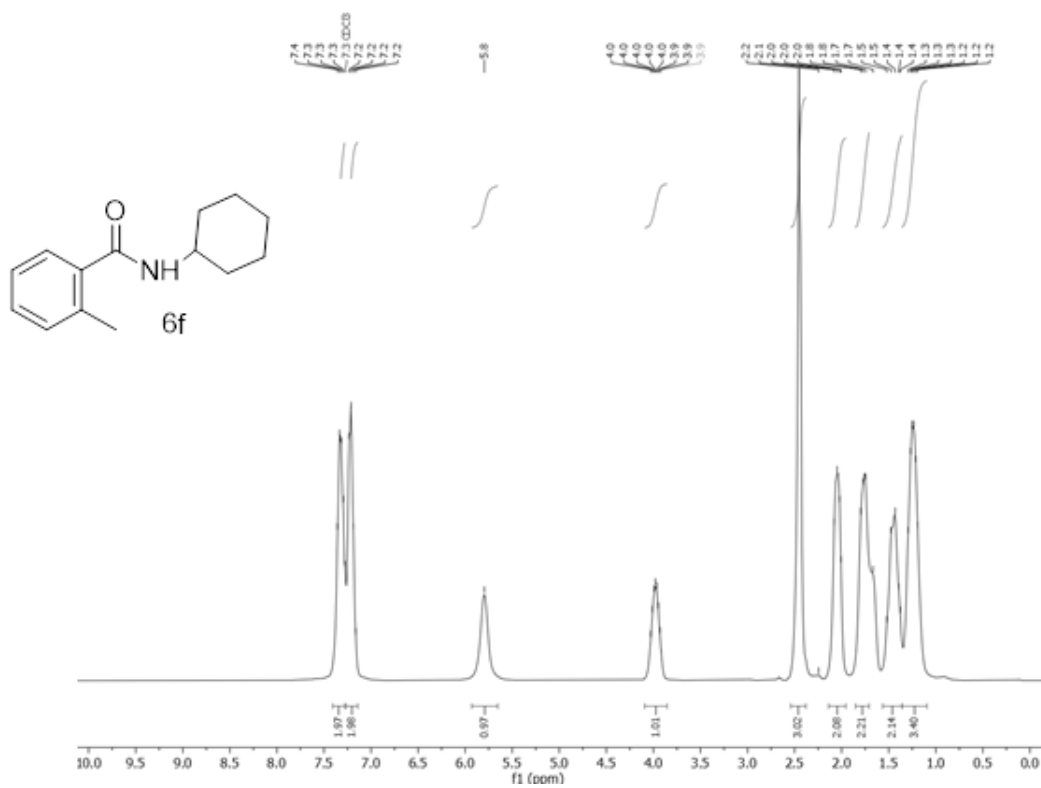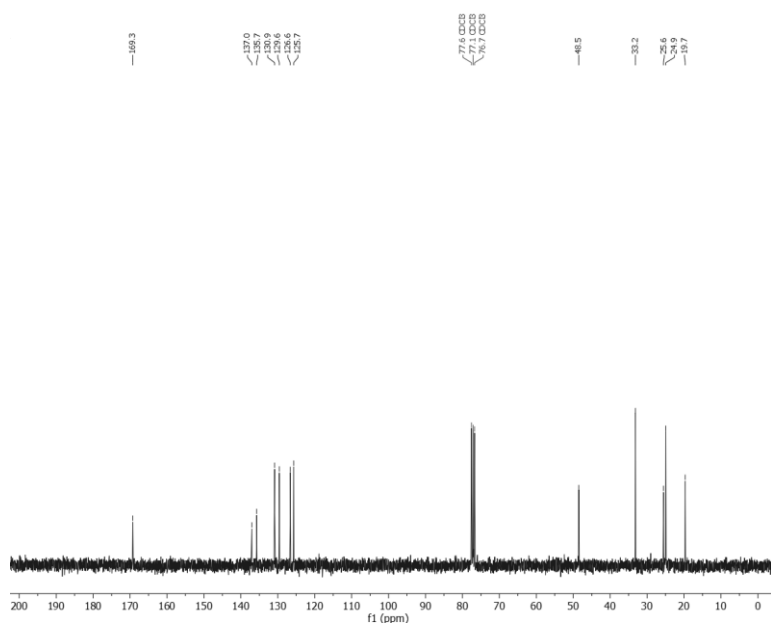

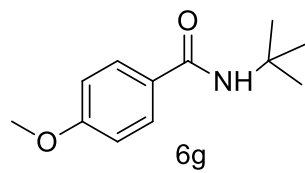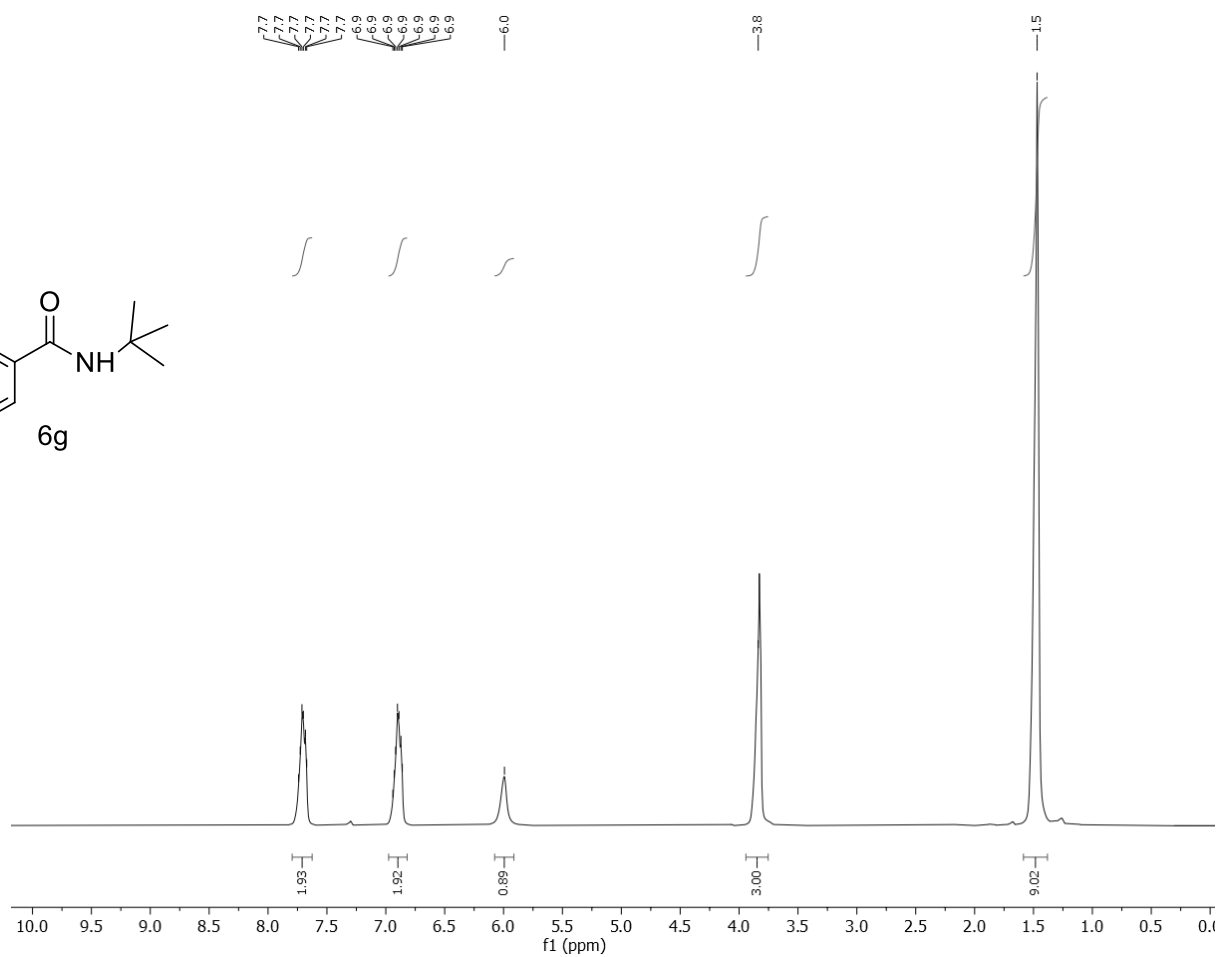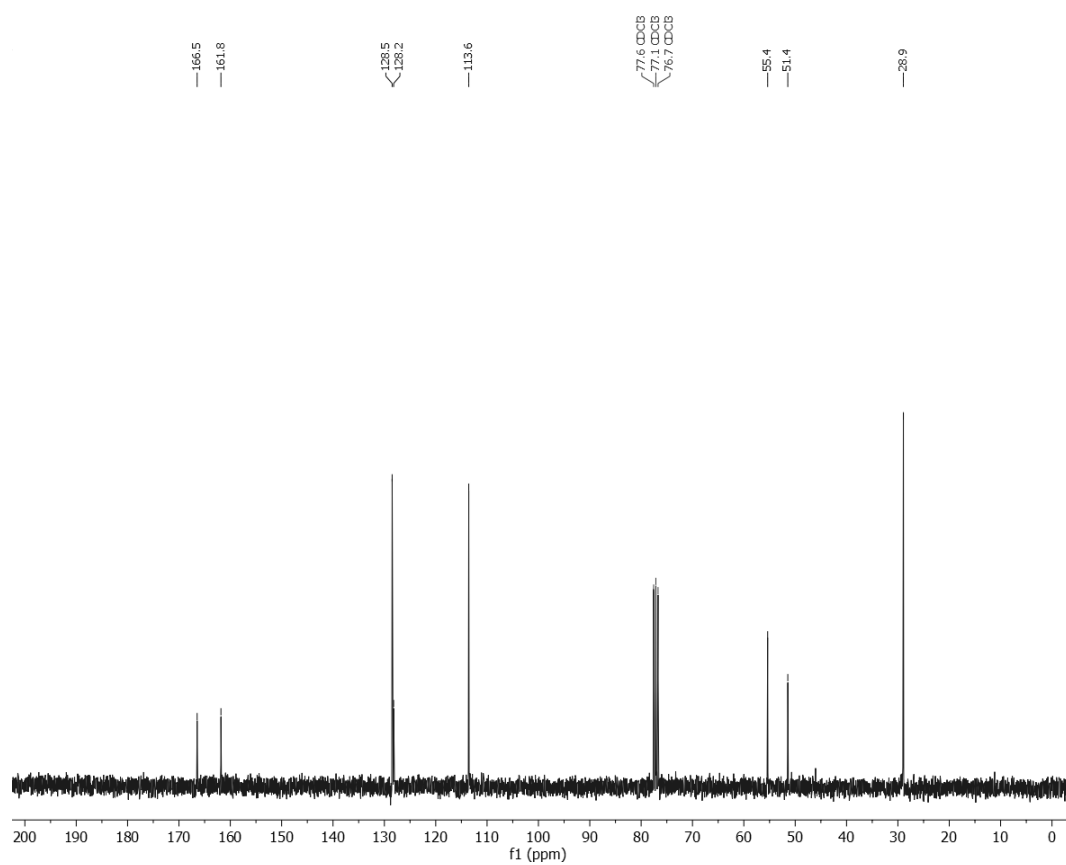

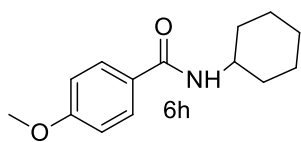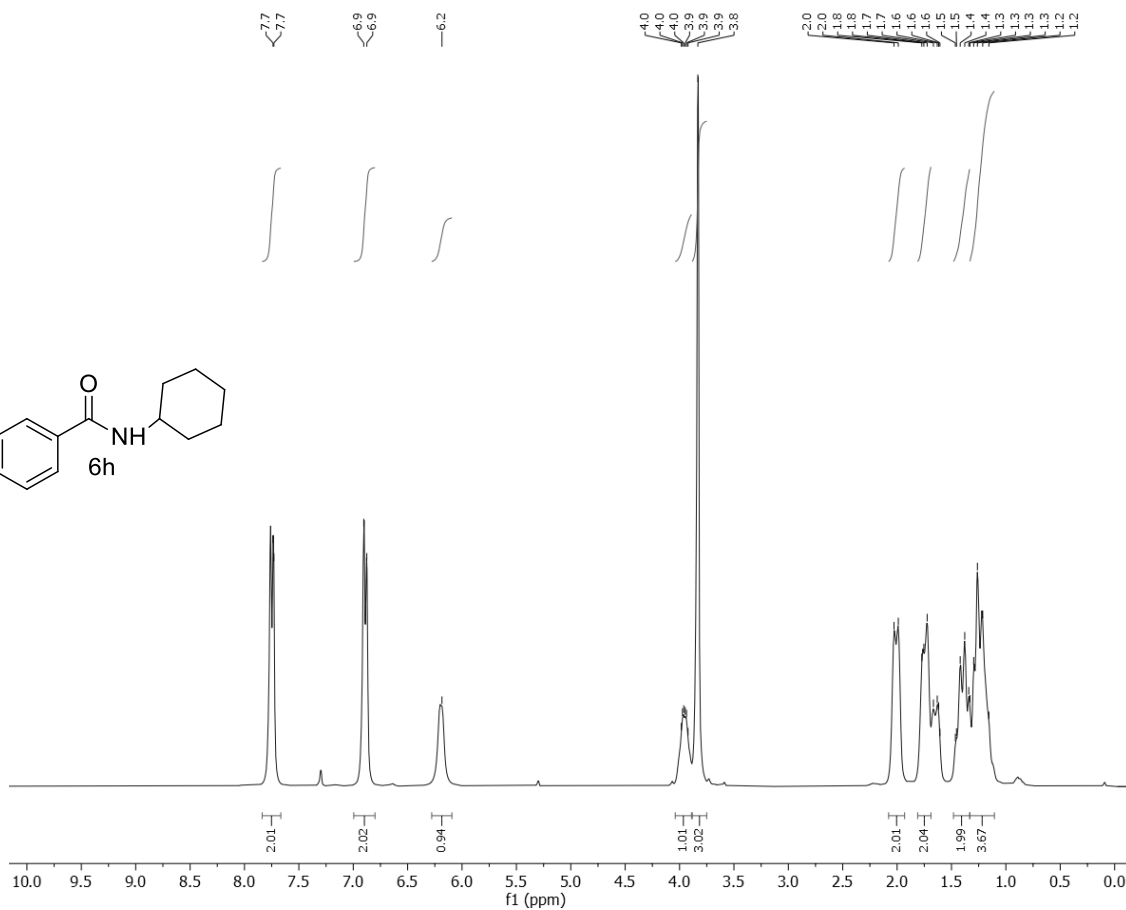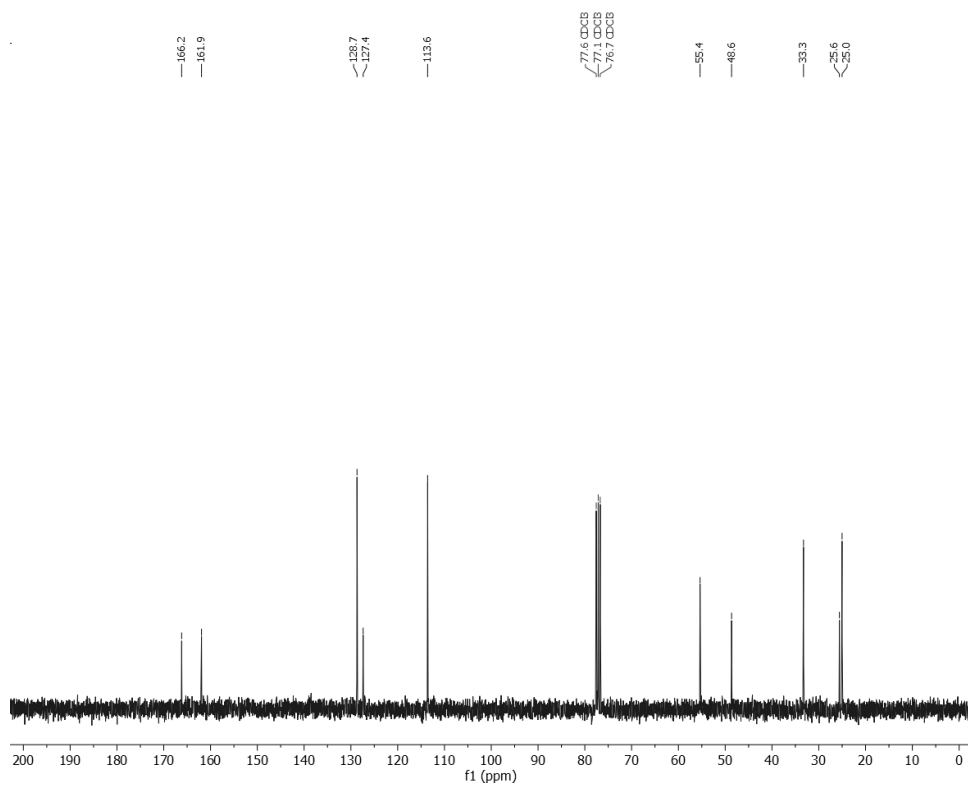

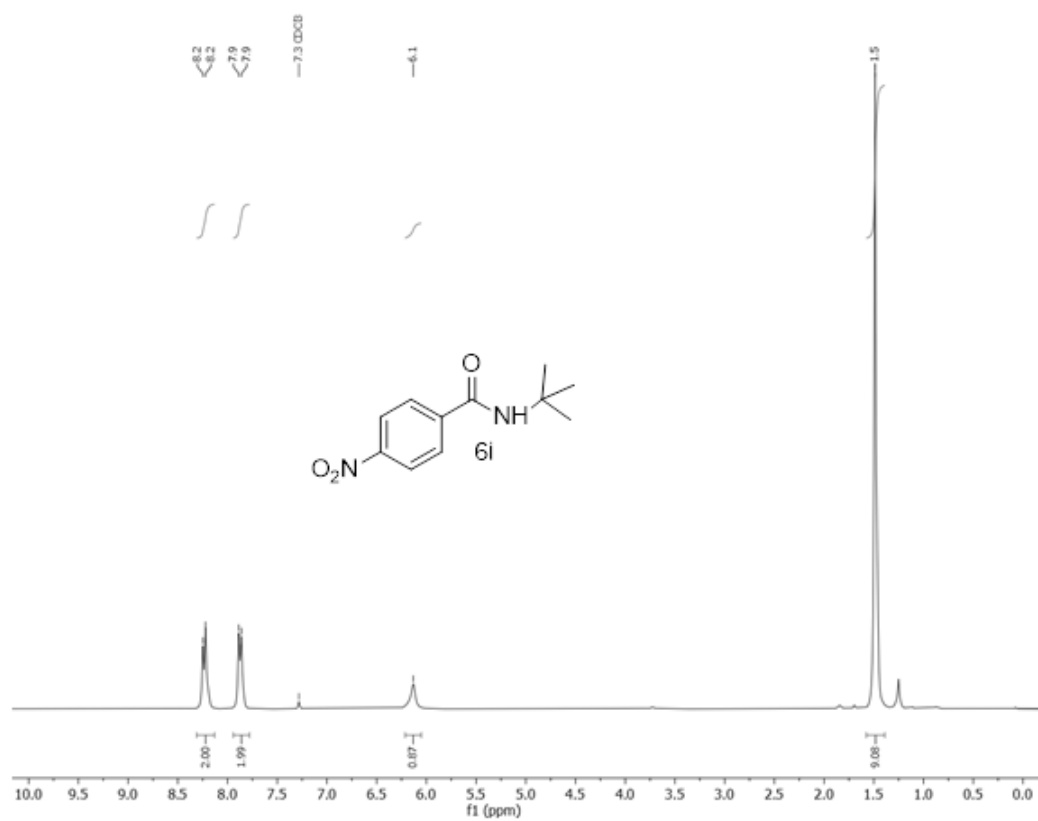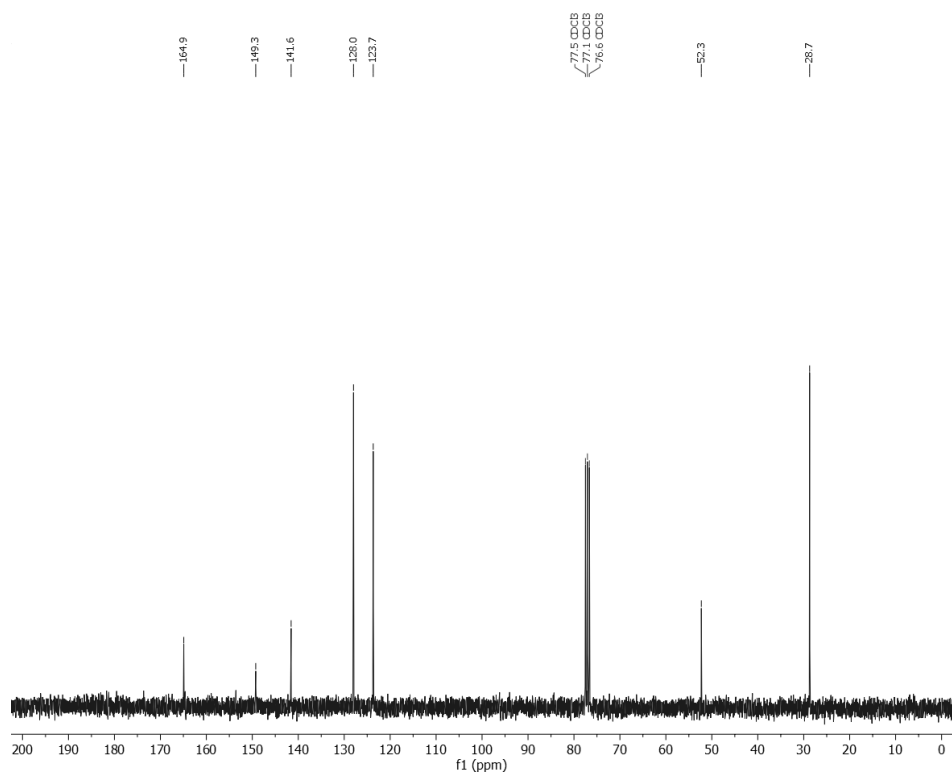

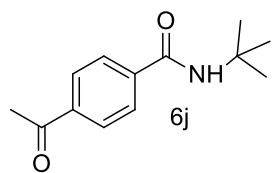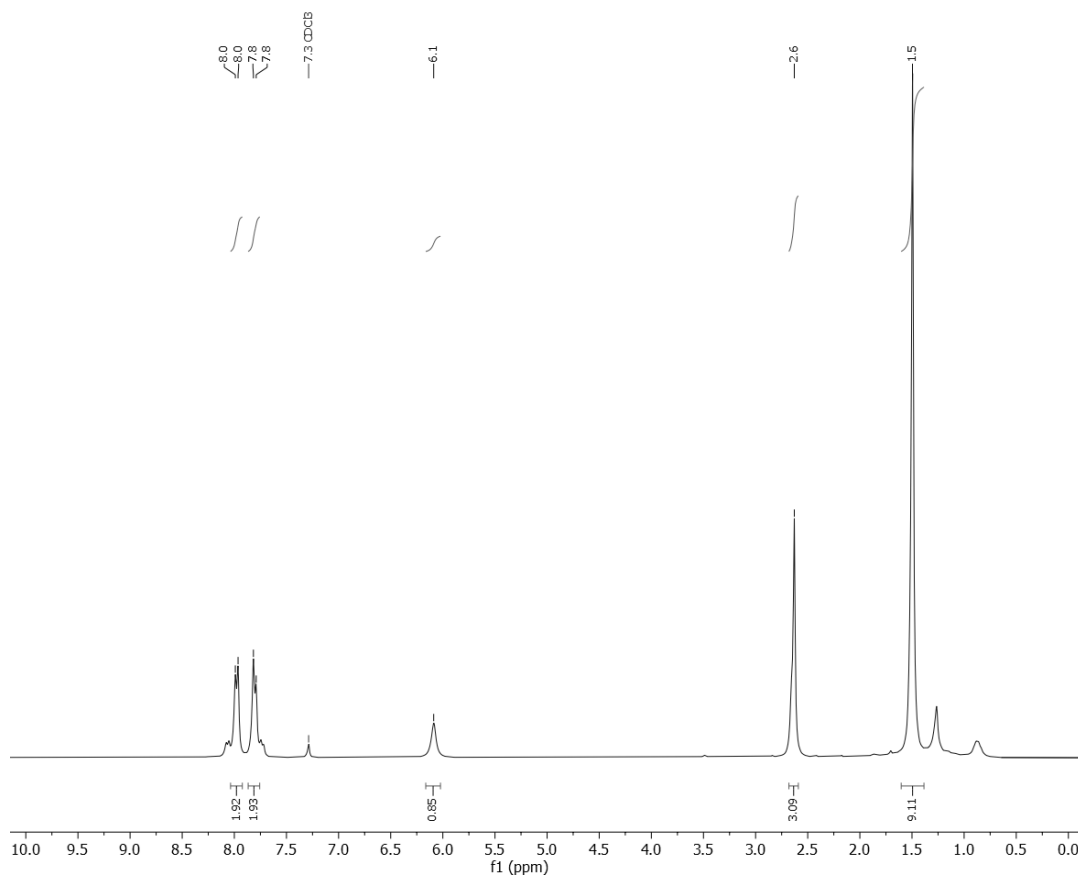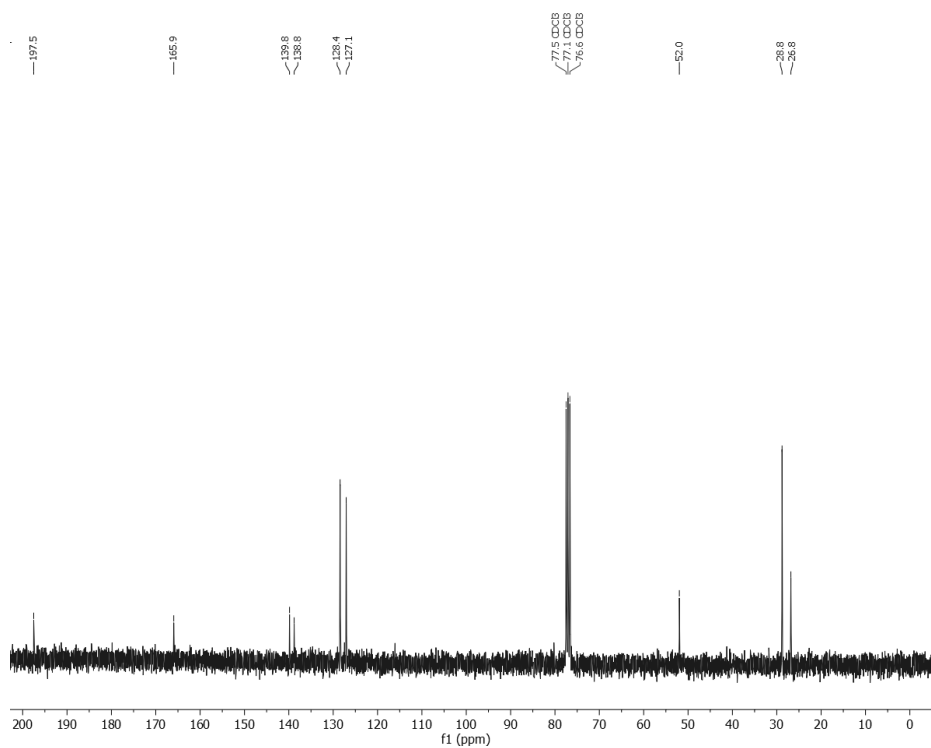

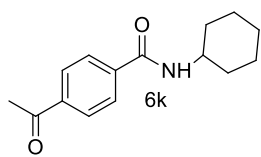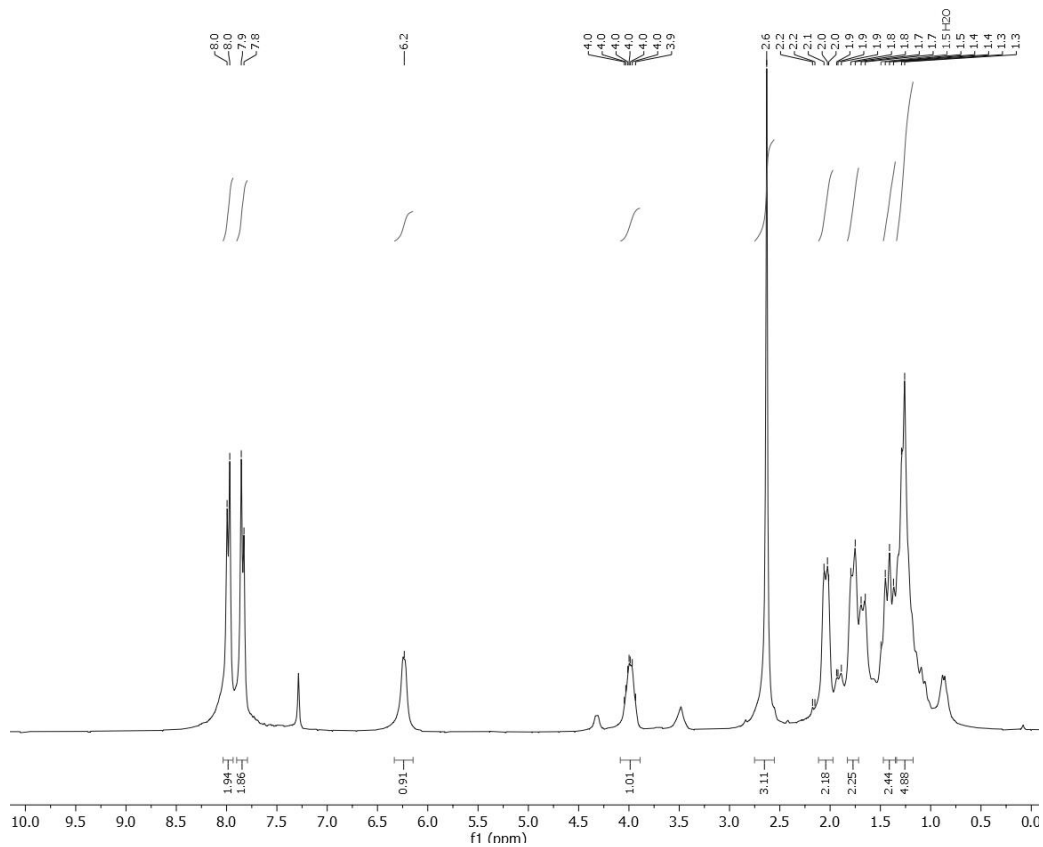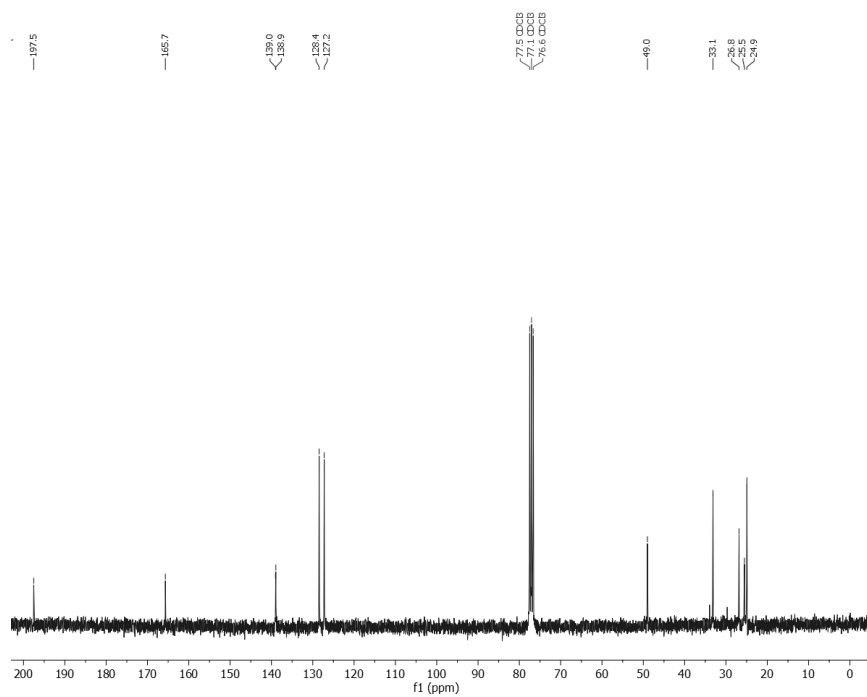

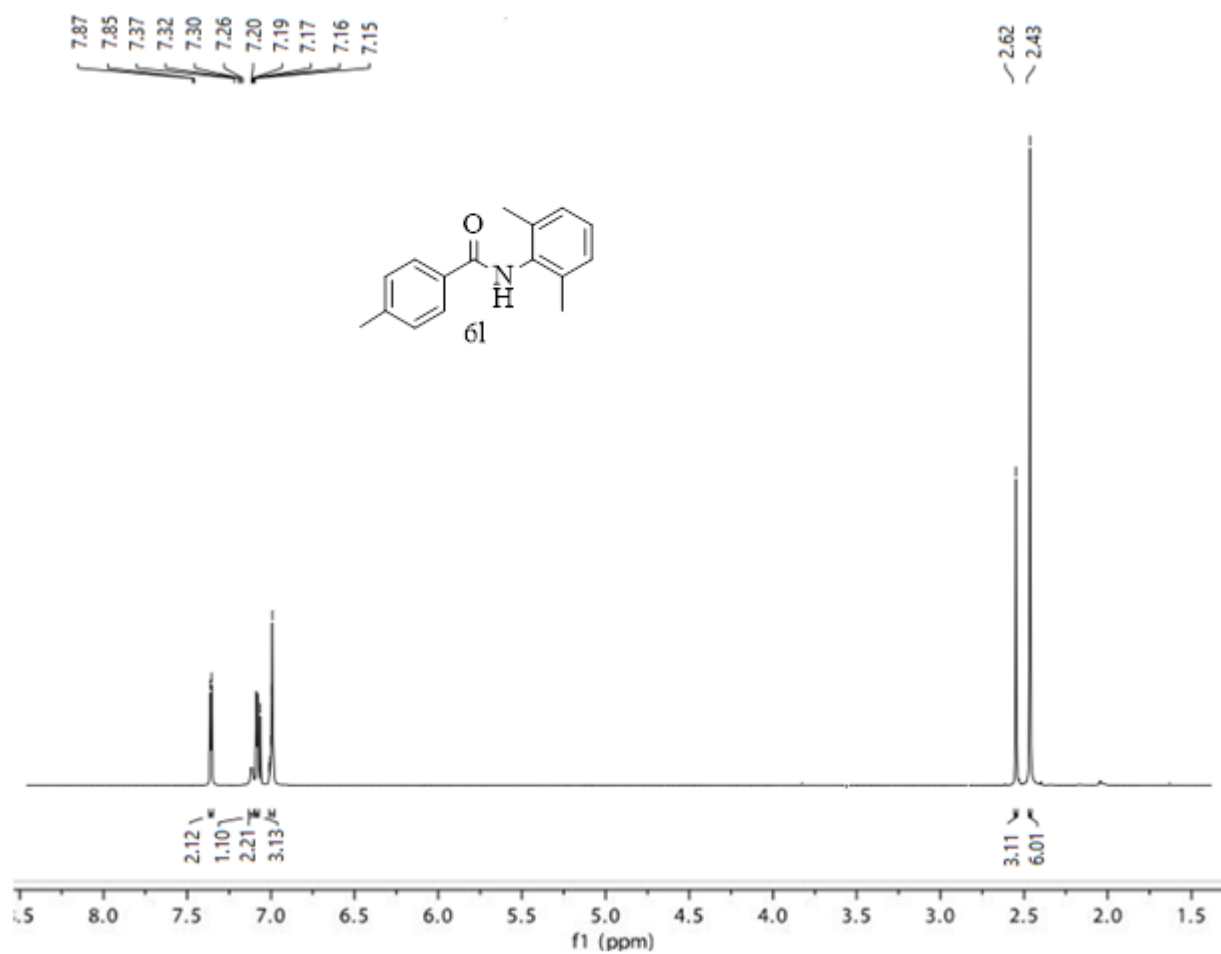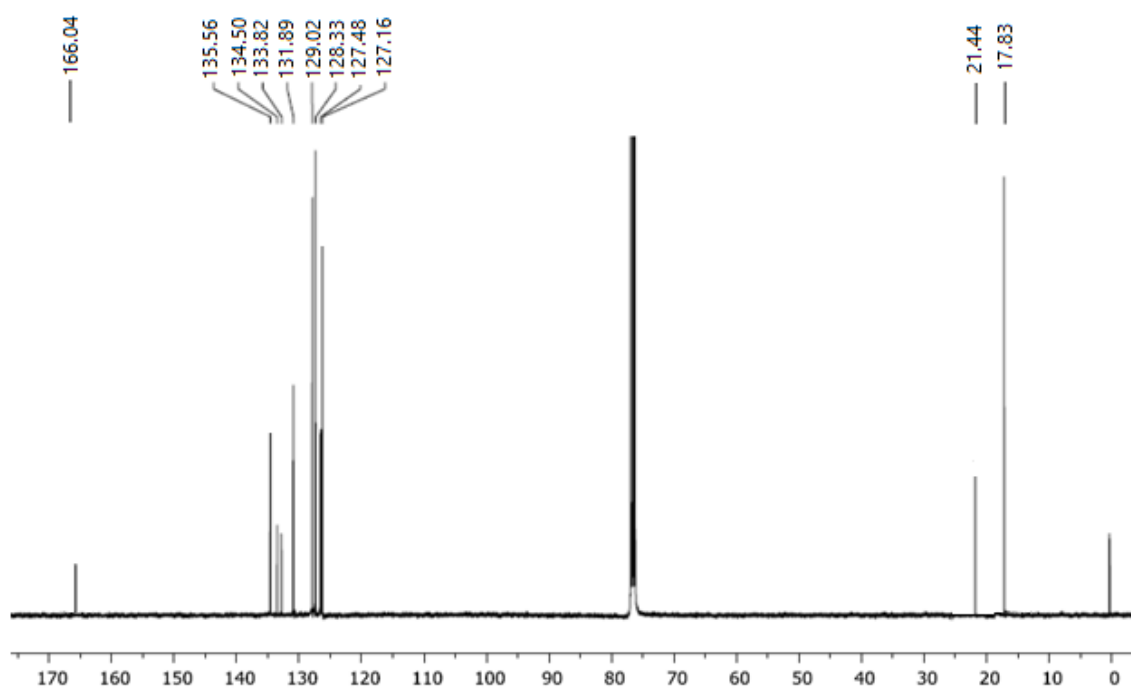

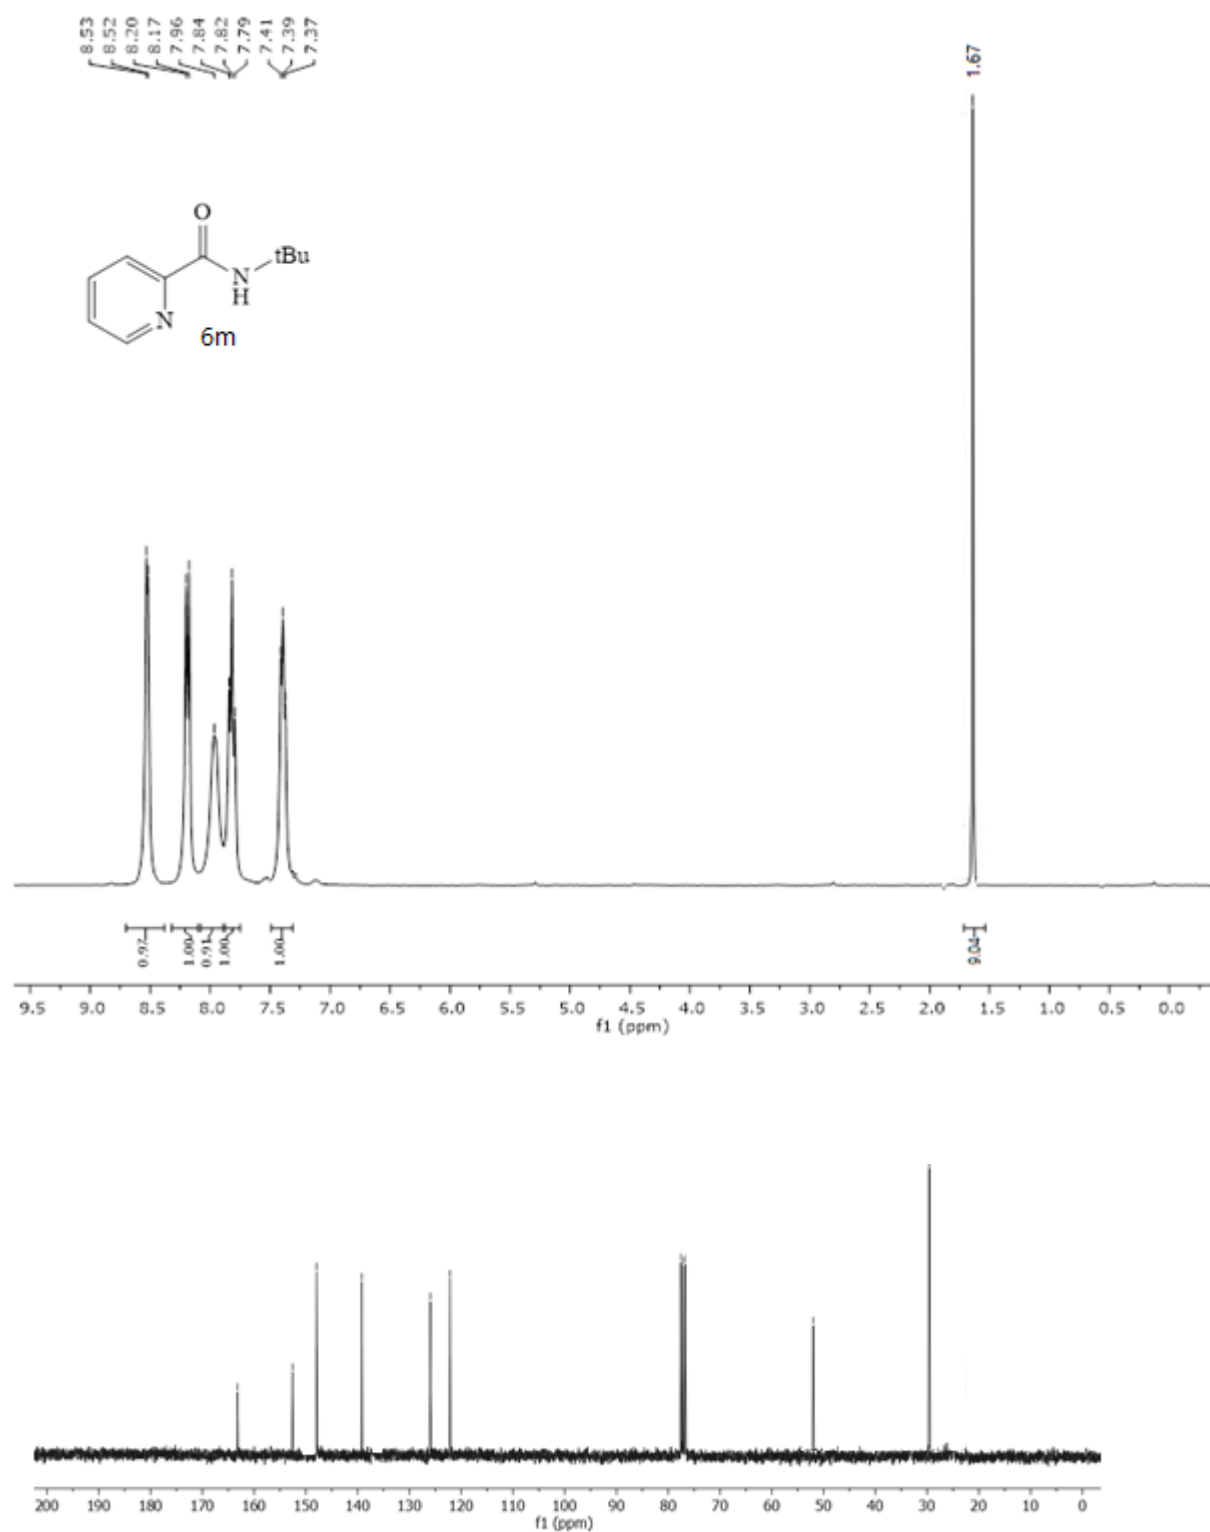

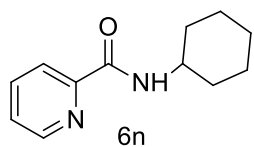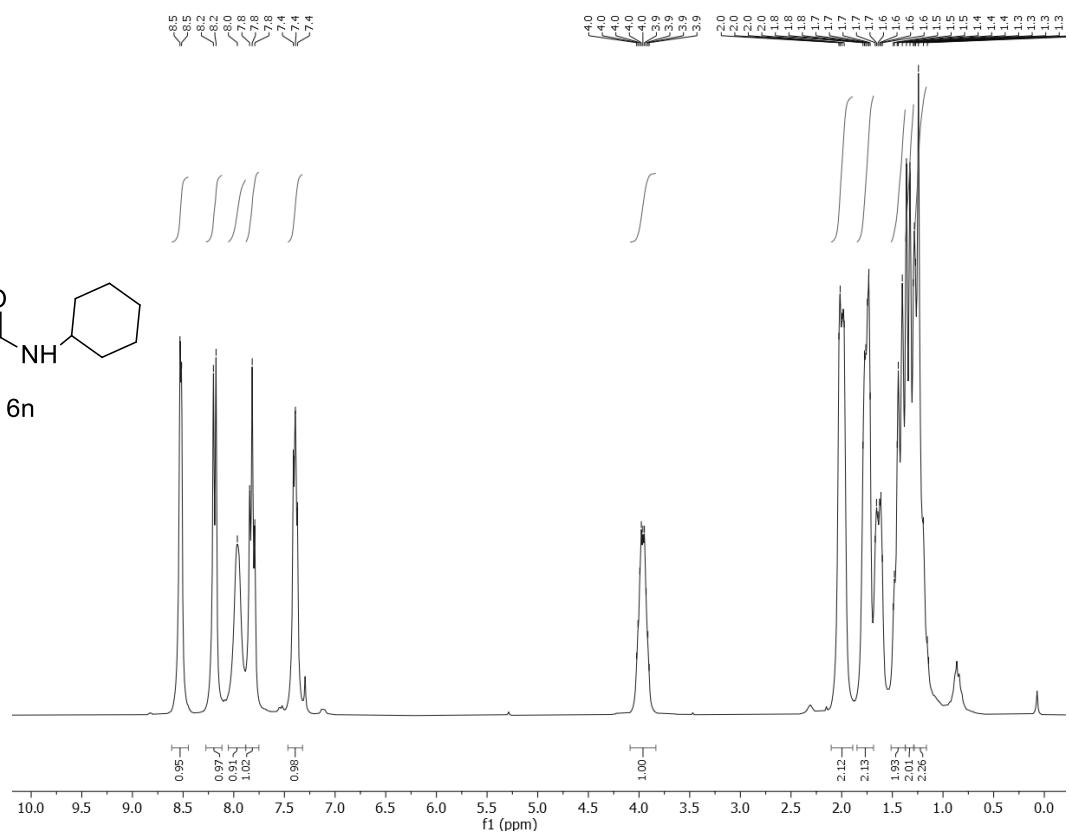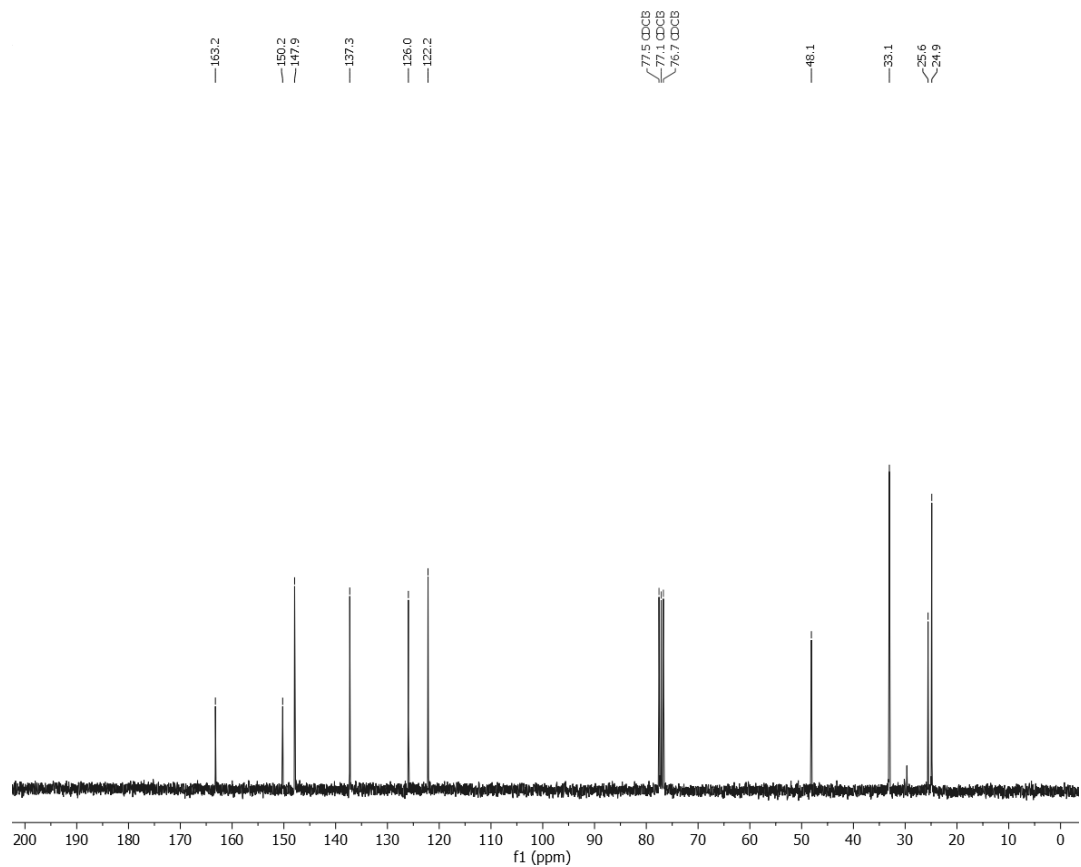

Supplement: d0nj06301k2.pdf [file d0nj06301k2.pdf]
