# Supplementary figures and images for: A case study of Pd⋯Pd intramolecular interaction in a benzothiazole based palladacycle; catalytic activity toward amide synthesisviaan isocyanide insertion pathway
Source: Royal Society of Chemistry journal article supplement (doi:10.1039/d0nj06301k), 2021-01-01

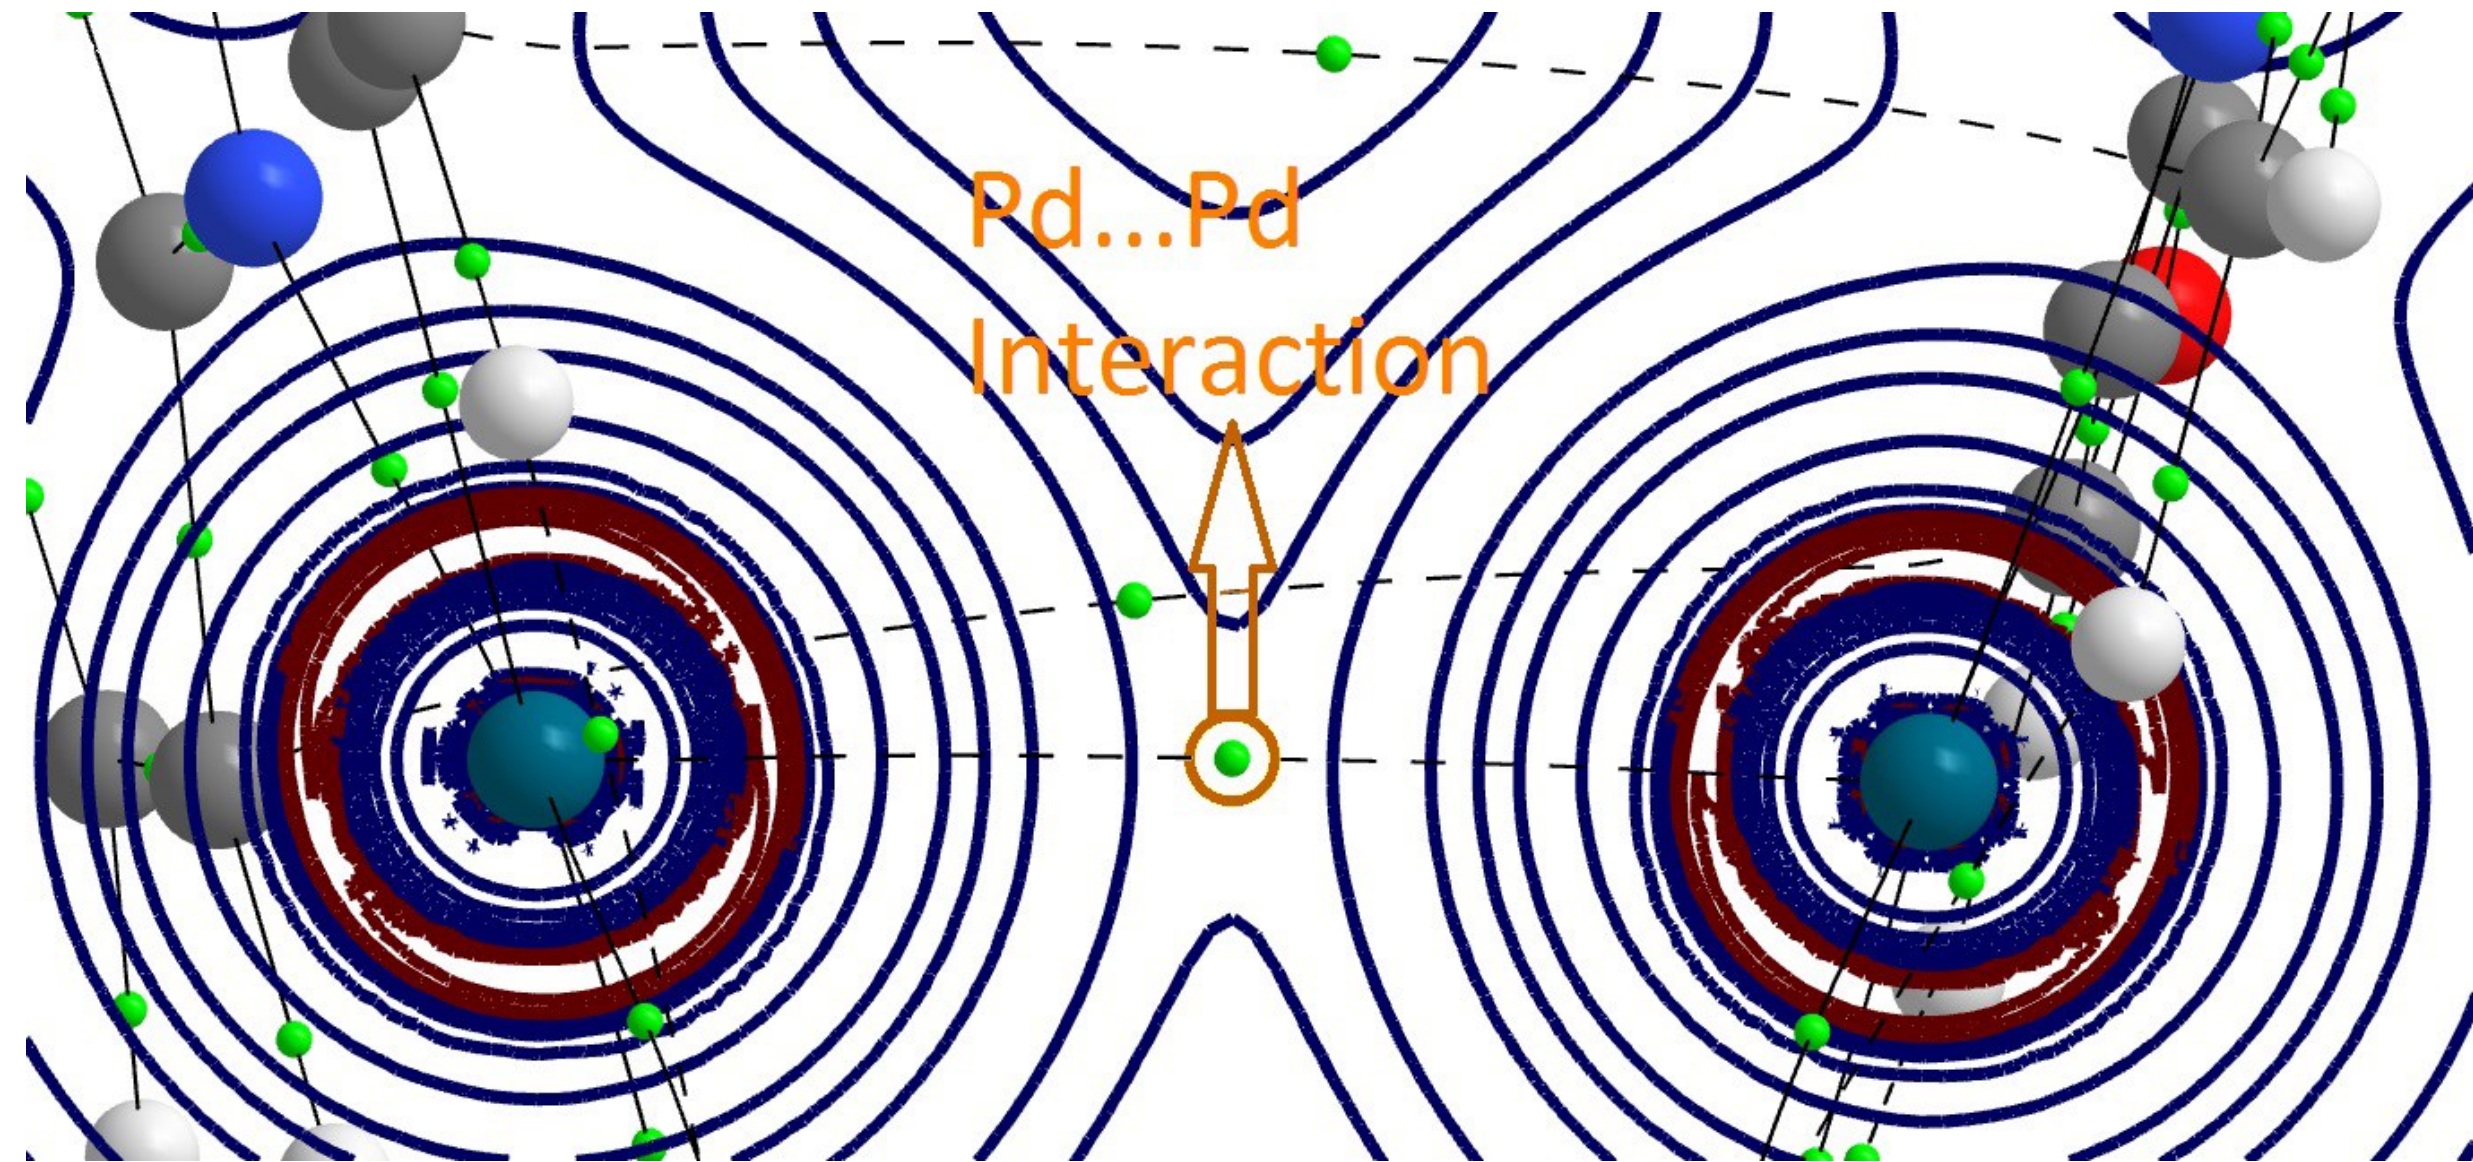

Supplement: d0nj06301k1.pdf [file d0nj06301k1.pdf]
